# Supplementary material for: Integrated Expression Profiling and Genome-Wide Analysis of ChREBP Targets Reveals the Dual Role for ChREBP in Glucose-Regulated Gene Expression
Source: PubMed Central journal article supplement (PMC3141076; doi:10.1371/journal.pone.0022544), 2011-07-21
Supplement: pone.0022544.s003.pdf [file pone.0022544.s003.pdf]

**Table S1. The peak location and the nearest gene list**

| #ID   | chrom | start     | stop      | nearGeneID   | distance | nearGene Symbol | Description                                                                     |
|-------|-------|-----------|-----------|--------------|----------|-----------------|---------------------------------------------------------------------------------|
| lys1  | chr1  | 1326113   | 1326409   | NR_015434    | 1342     | LOC148413       | -                                                                               |
| lys2  | chr1  | 1346399   | 1346907   | NM_001145210 | 0        | LOC441869       | -                                                                               |
| lys3  | chr1  | 1366205   | 1366704   | NM_199121    | 5435     | VWA1            | von Willebrand factor A domain containing 1                                     |
| lys4  | chr1  | 1863284   | 1863806   | NM_001003808 | 14057    | C1orf222        | chromosome 1 open reading frame 222                                             |
| lys5  | chr1  | 2155750   | 2156349   | NM_003036    | 5758     | SKI             | v-ski sarcoma viral oncogene homolog (avian)                                    |
| lys6  | chr1  | 2252267   | 2252475   | NR_024489    | -21485   | LOC100129534    | -                                                                               |
| lys7  | chr1  | 3360703   | 3361019   | NM_014448    | 0        | ARHGEF16        | Rho guanine nucleotide exchange factor (GEF) 16                                 |
| lys8  | chr1  | 5931971   | 5932340   | NM_015102    | -42778   | NPHP4           | nephronophthisis 4                                                              |
| lys9  | chr1  | 6008658   | 6009073   | NM_003636    | 0        | KCNAB2          | potassium voltage-gated channel, shaker-related subfamily, beta member 2        |
| lys10 | chr1  | 6397047   | 6397287   | NM_019089    | -5279    | HES2            | hairly and enhancer of split 2 (Drosophila)                                     |
| lys11 | chr1  | 8152381   | 8152723   |              |          |                 |                                                                                 |
| lys12 | chr1  | 8180416   | 8180914   |              |          |                 |                                                                                 |
| lys13 | chr1  | 8194485   | 8195071   |              |          |                 |                                                                                 |
| lys14 | chr1  | 9532832   | 9533193   | NM_032315    | 10719    | SLC25A33        | solute carrier family 25, member 33                                             |
| lys15 | chr1  | 9536428   | 9536814   | NM_032315    | 14315    | SLC25A33        | solute carrier family 25, member 33                                             |
| lys16 | chr1  | 10919980  | 10920450  | NM_173507    | -26395   | C1orf127        | chromosome 1 open reading frame 127                                             |
| lys17 | chr1  | 11910488  | 11910918  | NM_138346    | 1422     | KIAA2013        | KIAA2013                                                                        |
| lys18 | chr1  | 12507994  | 12508296  | NR_003022    | 18109    | SNORA59B        | small nucleolar RNA, H/ACA box 59B                                              |
| lys19 | chr1  | 12511000  | 12511457  | NM_015378    | 298302   | VPS13D          | vacuolar protein sorting 13 homolog D (S. cerevisiae)                           |
| lys20 | chr1  | 15608784  | 15609163  | NM_024329    | 0        | EFHD2           | EF-hand domain family, member D2                                                |
| lys21 | chr1  | 15784022  | 15784349  | NM_024758    | 0        | AGMAT           | agmatine ureohydrolase (agmatinase)                                             |
| lys22 | chr1  | 15817903  | 15818098  | NM_032341    | 1248     | DDI2            | DNA-damage inducible 1 homolog 2 (S. cerevisiae)                                |
| lys23 | chr1  | 17763501  | 17764065  | NM_001011722 | -15569   | ARHGEF10L       | Rho guanine nucleotide exchange factor (GEF) 10-like                            |
| lys24 | chr1  | 17791068  | 17791437  | NM_001011722 | 11435    | ARHGEF10L       | Rho guanine nucleotide exchange factor (GEF) 10-like                            |
| lys25 | chr1  | 19136139  | 19136426  | NM_001136265 | -18987   | IFFO2           | intermediate filament family orphan 2                                           |
| lys26 | chr1  | 21468804  | 21469126  | NM_001113347 | -9644    | ECE1            | endothelin converting enzyme 1                                                  |
| lys27 | chr1  | 22101900  | 22102130  | NM_005529    | -34207   | HSPG2           | heparan sulfate proteoglycan 2                                                  |
| lys28 | chr1  | 24024452  | 24024694  | NM_000191    | 0        | HMGCL           | 3-hydroxymethyl-3-methylglutaryl-CoA lyase                                      |
| lys29 | chr1  | 24318851  | 24319159  | NM_152372    | 7600     | MYOM3           | myomesin family, member 3                                                       |
| lys30 | chr1  | 26217782  | 26218030  | NM_004455    | -2827    | EXTL1           | exostosins (multiple)-like 1                                                    |
| lys31 | chr1  | 26699376  | 26699862  |              |          |                 |                                                                                 |
| lys32 | chr1  | 27189641  | 27190208  | NM_001013642 | -2573    | TRNP1           | TMF1-regulated nuclear protein 1                                                |
| lys33 | chr1  | 27741478  | 27741863  | NM_001029882 | -60867   | AHDC1           | AT hook, DNA binding motif, containing 1                                        |
| lys34 | chr1  | 28717957  | 28718184  | NM_001048195 | 627      | RCC1            | regulator of chromosome condensation 1                                          |
| lys35 | chr1  | 36702450  | 36702966  | NM_031280    | 0        | MRPS15          | mitochondrial ribosomal protein S15                                             |
| lys36 | chr1  | 38269746  | 38269995  | NM_002699    | -15042   | POU3F1          | POU class 3 homeobox 1                                                          |
| lys37 | chr1  | 39098037  | 39098291  | NM_022157    | 111      | RRAGC           | Ras-related GTP binding C                                                       |
| lys38 | chr1  | 40137410  | 40137590  | NM_001033082 | -2684    | MYCL1           | v-myc myelocytomatosis viral oncogene homolog 1, lung carcinoma derived (avian) |
| lys39 | chr1  | 43277587  | 43277920  |              |          |                 |                                                                                 |
| lys40 | chr1  | 44247880  | 44248294  | NM_006934    | -7290    | SLC6A9          | solute carrier family 6 (neurotransmitter transporter, glycine), member 9       |
| lys41 | chr1  | 44870059  | 44870388  | NM_018150    | 226514   | RNF220          | ring finger protein 220                                                         |
| lys42 | chr1  | 44939349  | 44939796  | NM_001145636 | 26370    | C1orf228        | chromosome 1 open reading frame 228                                             |
| lys43 | chr1  | 44946530  | 44946979  | NM_001145636 | 33551    | C1orf228        | chromosome 1 open reading frame 228                                             |
| lys44 | chr1  | 52941520  | 52941907  | NM_023077    | 4895     | C1orf163        | chromosome 1 open reading frame 163                                             |
| lys45 | chr1  | 53359861  | 53360348  | NM_006671    | -20529   | SLC1A7          | solute carrier family 1 (glutamate transporter), member 7                       |
| lys46 | chr1  | 53399166  | 53399598  | NM_006671    | 18290    | SLC1A7          | solute carrier family 1 (glutamate transporter), member 7                       |
| lys47 | chr1  | 53421658  | 53422100  | NM_000098    | -12588   | CPT2            | carnitine palmitoyltransferase 2                                                |
| lys48 | chr1  | 56651983  | 56652494  |              |          |                 |                                                                                 |
| lys49 | chr1  | 56746641  | 56747136  | NM_003713    | -70709   | PPAP2B          | phosphatidic acid phosphatase type 2B                                           |
| lys50 | chr1  | 56748329  | 56748639  | NM_003713    | -69206   | PPAP2B          | phosphatidic acid phosphatase type 2B                                           |
| lys51 | chr1  | 59452952  | 59453427  |              |          |                 |                                                                                 |
| lys52 | chr1  | 65386033  | 65386259  | NM_001005353 | 0        | AK3L1           | adenylate kinase 3-like 1                                                       |
| lys53 | chr1  | 67772762  | 67773296  |              |          |                 |                                                                                 |
| lys54 | chr1  | 67790701  | 67790991  |              |          |                 |                                                                                 |
| lys55 | chr1  | 77921083  | 77921466  | NM_015534    | 153      | ZZZ3            | zinc finger, ZZ-type containing 3                                               |
| lys56 | chr1  | 85567314  | 85567636  | NM_012137    | -135841  | DDAH1           | dimethylarginine dimethylaminohydrolase 1                                       |
| lys57 | chr1  | 87031036  | 87031725  |              |          |                 |                                                                                 |
| lys58 | chr1  | 90232963  | 90233298  | NR_002830    | 0        | LOC492303       | -                                                                               |
| lys59 | chr1  | 95360483  | 95360834  | NM_152487    | 5003     | TMEM56          | transmembrane protein 56                                                        |
| lys60 | chr1  | 109297674 | 109297893 | NM_001048210 | -9741    | CLCC1           | chloride channel CLIC-like 1                                                    |
| lys61 | chr1  | 109618856 | 109619326 | NM_032636    | -7968    | PSRC1           | proline/serine-rich coiled-coil 1                                               |
| lys62 | chr1  | 109642826 | 109643109 | NM_001010985 | -8077    | MYBPHL          | myosin binding protein H-like                                                   |
| lys63 | chr1  | 111389452 | 111389768 |              |          |                 |                                                                                 |
| lys64 | chr1  | 112099592 | 112099969 | NM_198926    | 0        | C1orf183        | chromosome 1 open reading frame 183                                             |
| lys65 | chr1  | 113561622 | 113561932 |              |          |                 |                                                                                 |
| lys66 | chr1  | 114273050 | 114273322 | NM_198268    | -196     | HIPK1           | homeodomain interacting protein kinase 1                                        |
| lys67 | chr1  | 116833501 | 116833851 |              |          |                 |                                                                                 |
| lys68 | chr1  | 120068981 | 120069306 | NM_006623    | 13041    | PHGDH           | phosphoglycerate dehydrogenase                                                  |
| lys69 | chr1  | 142720950 | 142721698 |              |          |                 |                                                                                 |
| lys70 | chr1  | 144111080 | 144111283 | NM_213653    | -13264   | HFE2            | hemochromatosis type 2 (juvenile)                                               |
| lys71 | chr1  | 144149531 | 144149950 | NM_006472    | 0        | TXNIP           | thioredoxin interacting protein                                                 |
| lys72 | chr1  | 150071741 | 150072057 | NM_005060    | 770      | RORC            | RAR-related orphan receptor C                                                   |
| lys73 | chr1  | 152658677 | 152658999 | NM_000565    | 14386    | IL6R            | interleukin 6 receptor                                                          |
| lys74 | chr1  | 153239957 | 153240601 | NM_015872    | -1134    | ZBTB7B          | zinc finger and BTB domain containing 7B                                        |
| lys75 | chr1  | 153242920 | 153243371 | NM_015872    | 1186     | ZBTB7B          | zinc finger and BTB domain containing 7B                                        |
| lys76 | chr1  | 153346480 | 153346697 | NM_004952    | 28510    | EFNA3           | ephrin-A3                                                                       |
| lys77 | chr1  | 153365004 | 153365520 | NM_182685    | -1452    | EFNA1           | ephrin-A1                                                                       |
| lys78 | chr1  | 153537355 | 153537619 | NM_181871    | 0        | PKLR            | pyruvate kinase, liver and RBC                                                  |
| lys79 | chr1  | 154452855 | 154453282 | NM_007221    | 3449     | PMF1            | polyamine-modulated factor 1                                                    |
| lys80 | chr1  | 158207285 | 158207836 | NM_001146172 | 16618    | SLAMF9          | SLAM family member 9                                                            |
| lys81 | chr1  | 159459919 | 159460381 | NM_001643    | 0        | APOA2           | apolipoprotein A-II                                                             |
| lys82 | chr1  | 167070362 | 167070658 |              |          |                 |                                                                                 |
| lys83 | chr1  | 169721078 | 169721342 | NM_015172    | 0        | BAT2D1          | HLA-B associated transcript 2-like 2                                            |
| lys84 | chr1  | 177340639 | 177341094 | NM_022371    | 22906    | TOR3A           | torsin family 3, member A                                                       |
| lys85 | chr1  | 180524558 | 180525005 |              |          |                 |                                                                                 |
| lys86 | chr1  | 180529085 | 180529432 |              |          |                 |                                                                                 |
| lys87 | chr1  | 181705972 | 181706220 | NM_173156    | -2036    | SMG7            | Smg-7 homolog, nonsense mediated mRNA decay factor (C. elegans)                 |
| lys88 | chr1  | 203537109 | 203537473 | NM_030952    | -20033   | NUAK2           | NUAK family, SNF1-like kinase, 2                                                |
| lys89 | chr1  | 205481555 | 205481909 |              |          |                 |                                                                                 |
| lys90 | chr1  | 209759466 | 209759988 |              |          |                 |                                                                                 |
| lys91 | chr1  | 209819349 | 209820023 | NM_021194    | 628      | SLC30A1         | solute carrier family 30 (zinc transporter), member 1                           |

|        |       |           |           |              |         |                |                                                                                                                  |  |
|--------|-------|-----------|-----------|--------------|---------|----------------|------------------------------------------------------------------------------------------------------------------|--|
| lys92  | chr1  | 209843412 | 209843680 |              |         |                |                                                                                                                  |  |
| lys93  | chr1  | 209883244 | 209883620 | NM_002497    | -31970  | NEK2           | NIMA (never in mitosis gene a)-related kinase 2                                                                  |  |
| lys94  | chr1  | 209907173 | 209907605 | NM_002497    | -7985   | NEK2           | NIMA (never in mitosis gene a)-related kinase 2                                                                  |  |
| lys95  | chr1  | 210848218 | 210848898 | NM_001040619 | 0       | ATF3           | activating transcription factor 3                                                                                |  |
| lys96  | chr1  | 211612068 | 211612550 |              |         |                |                                                                                                                  |  |
| lys97  | chr1  | 212196245 | 212196755 |              |         |                |                                                                                                                  |  |
| lys98  | chr1  | 212290405 | 212290961 | NM_002763    | 61924   | PROX1          | prospero homeobox 1                                                                                              |  |
| lys99  | chr1  | 222019577 | 222020052 | NM_001748    | 52837   | CAPN2          | calpain 2, (m/II) large subunit                                                                                  |  |
| lys100 | chr1  | 224067749 | 224068206 | NM_001136018 | 3331    | EPHX1          | epoxide hydrolase 1, microsomal (xenobiotic)                                                                     |  |
| lys101 | chr1  | 224079408 | 224079715 | NM_000120    | 0       | EPHX1          | epoxide hydrolase 1, microsomal (xenobiotic)                                                                     |  |
| lys102 | chr1  | 225194425 | 225194699 | NM_020247    | 0       | CABC1          | chaperone, ABC1 activity of bc1 complex homolog (S. pombe)                                                       |  |
| lys103 | chr1  | 227063439 | 227063870 |              |         |                |                                                                                                                  |  |
| lys104 | chr1  | 228910964 | 228911494 | NM_000029    | -5465   | AGT            | angiotensinogen (serpin peptidase inhibitor, clade A, member 8)                                                  |  |
| lys105 | chr1  | 228916422 | 228917086 | NM_000029    | 0       | AGT            | angiotensinogen (serpin peptidase inhibitor, clade A, member 8)                                                  |  |
| lys106 | chr1  | 228931223 | 228931695 | NM_000029    | 14265   | AGT            | angiotensinogen (serpin peptidase inhibitor, clade A, member 8)                                                  |  |
| lys107 | chr1  | 232808624 | 232808932 | NM_182972    | -2962   | IRF2BP2        | interferon regulatory factor 2 binding protein 2                                                                 |  |
| lys108 | chr1  | 232823545 | 232823833 | NM_182972    | 11652   | IRF2BP2        | interferon regulatory factor 2 binding protein 2                                                                 |  |
| lys109 | chr1  | 233076922 | 233077214 |              |         |                |                                                                                                                  |  |
| lys110 | chr1  | 233159368 | 233159632 |              |         |                |                                                                                                                  |  |
| lys111 | chr1  | 233159744 | 233160244 |              |         |                |                                                                                                                  |  |
| lys112 | chr1  | 233176099 | 233176416 |              |         |                |                                                                                                                  |  |
| lys113 | chr1  | 233177316 | 233178313 |              |         |                |                                                                                                                  |  |
| lys114 | chr1  | 233178610 | 233178903 |              |         |                |                                                                                                                  |  |
| lys115 | chr1  | 233181154 | 233181488 |              |         |                |                                                                                                                  |  |
| lys116 | chr1  | 234269677 | 234269917 | NM_002508    | -25187  | NID1           | nidogen 1                                                                                                        |  |
| lys117 | chr1  | 234629506 | 234629870 | NM_080738    | 4169    | EDARADD        | EDAR-associated death domain                                                                                     |  |
| lys118 | chr1  | 234745452 | 234745686 | NM_201545    | -2501   | LGALS8         | lectin, galactoside-binding, soluble, 8                                                                          |  |
| lys119 | chr1  | 236094312 | 236094517 | NR_027247    | 2216    | LOC100130331   | -                                                                                                                |  |
| lys120 | chr1  | 241735845 | 241736239 | NM_006642    | 249904  | SDCCAG8        | serologically defined colon cancer antigen 8                                                                     |  |
| lys121 | chr10 | 5748890   | 5749232   | NM_024701    | 327     | ASB13          | ankyrin repeat and SOCS box-containing 13                                                                        |  |
| lys122 | chr10 | 5895278   | 5896190   | NM_001494    | 0       | GDI2           | GDP dissociation inhibitor 2                                                                                     |  |
| lys123 | chr10 | 11983563  | 11983750  | NM_015542    | -141064 | UPF2           | UPF2 regulator of nonsense transcripts homolog (yeast)                                                           |  |
| lys124 | chr10 | 14614770  | 14615083  | NM_031453    | -241819 | FAM107B        | family with sequence similarity 107, member B                                                                    |  |
| lys125 | chr10 | 22649758  | 22650132  | NM_005180    | 0       | BMI1           | BMI1 polycomb ring finger oncogene                                                                               |  |
| lys126 | chr10 | 24870112  | 24870532  | NM_001098501 | 332388  | KIAA1217       | KIAA1217                                                                                                         |  |
| lys127 | chr10 | 30882887  | 30883342  |              |         |                |                                                                                                                  |  |
| lys128 | chr10 | 44811833  | 44812047  | NM_006963    | -4231   | ZNF22          | zinc finger protein 22 (KOX 15)                                                                                  |  |
| lys129 | chr10 | 45410174  | 45410577  | NM_145021    | 0       | MARCH8         | membrane-associated ring finger (C3HC4) 8                                                                        |  |
| lys130 | chr10 | 54206296  | 54206626  | NM_000242    | 4831    | MBL2           | mannose-binding lectin (protein C) 2, soluble (opsonic defect)                                                   |  |
| lys131 | chr10 | 70855672  | 70855909  | NM_001057    | 8993    | TACR2          | tachykinin receptor 2                                                                                            |  |
| lys132 | chr10 | 71539166  | 71539554  | NM_032797    | -23142  | AIFM2          | apoptosis-inducing factor, mitochondrion-associated, 2                                                           |  |
| lys133 | chr10 | 71782170  | 71782451  | NM_207119    | -28969  | LRRCC20        | leucine rich repeat containing 20                                                                                |  |
| lys134 | chr10 | 75021694  | 75021981  | NM_152586    | 16256   | USP54          | ubiquitin specific peptidase 54                                                                                  |  |
| lys135 | chr10 | 77206373  | 77207159  | NM_032024    | -5365   | C10orf11       | chromosome 10 open reading frame 11                                                                              |  |
| lys136 | chr10 | 77454351  | 77455073  | NM_032024    | 241828  | C10orf11       | chromosome 10 open reading frame 11                                                                              |  |
| lys137 | chr10 | 79278776  | 79279387  | NM_004747    | -76967  | DLG5           | discs, large homolog 5 (Drosophila)                                                                              |  |
| lys138 | chr10 | 80489016  | 80489307  | NR_024429    | -7904   | LOC283050      | -                                                                                                                |  |
| lys139 | chr10 | 80614025  | 80614302  | NM_020338    | 115229  | ZMI21          | zinc finger, MIZ-type containing 1                                                                               |  |
| lys140 | chr10 | 80765202  | 80765855  | NM_005729    | -11370  | PPIF           | peptidylprolyl isomerase F                                                                                       |  |
| lys141 | chr10 | 80777613  | 80777989  | NM_005729    | 389     | PPIF           | peptidylprolyl isomerase F                                                                                       |  |
| lys142 | chr10 | 82155995  | 82156370  | NM_032333    | -1851   | C10orf58       | chromosome 10 open reading frame 58                                                                              |  |
| lys143 | chr10 | 82248548  | 82248824  | NM_001128309 | 44532   | TSPAN14        | tetraspanin 14                                                                                                   |  |
| lys144 | chr10 | 91395472  | 91395928  | NM_148977    | 278     | PANK1          | pantothenate kinase 1                                                                                            |  |
| lys145 | chr10 | 93382779  | 93383081  | NM_005398    | 0       | PPP1R3C        | protein phosphatase 1, regulatory (inhibitor) subunit 3C                                                         |  |
| lys146 | chr10 | 95982535  | 95982778  | NM_016341    | 238801  | PLCE1          | phospholipase C, epsilon 1                                                                                       |  |
| lys147 | chr10 | 98427198  | 98427515  | NM_152309    | -42754  | PIK3AP1        | phosphoinositide-3-kinase adaptor protein 1                                                                      |  |
| lys148 | chr10 | 100196596 | 100196788 | NM_000195    | 0       | HPS1           | Hermansky-Pudlak syndrome 1                                                                                      |  |
| lys149 | chr10 | 102096112 | 102096496 | NM_005063    | -265    | SCD            | stearoyl-CoA desaturase (delta-9-desaturase)                                                                     |  |
| lys150 | chr10 | 102720834 | 102721212 | NM_017893    | -1063   | SEMA4G         | sema domain, immunoglobulin domain (Ig), transmembrane domain (TM) and short cytoplasmic domain, (semaphorin) 4G |  |
| lys151 | chr10 | 102862582 | 102863169 | NM_001085398 | -17724  | TD1            | TLX1 neighbor                                                                                                    |  |
| lys152 | chr10 | 104564683 | 104565003 | NM_000102    | -22277  | CYP17A1        | cytochrome P450, family 17, subfamily A, polypeptide 1                                                           |  |
| lys153 | chr10 | 105533956 | 105534171 | NM_014631    | -70983  | SH3PXD2A       | SH3 and PX domains 2A                                                                                            |  |
| lys154 | chr10 | 114011009 | 114011585 |              |         |                |                                                                                                                  |  |
| lys155 | chr10 | 114015526 | 114015838 | NM_058222    | -17644  | TECTB          | tectorin beta                                                                                                    |  |
| lys156 | chr10 | 114025622 | 114026001 | NM_058222    | -7481   | TECTB          | tectorin beta                                                                                                    |  |
| lys157 | chr10 | 114428329 | 114428702 | NM_145206    | 231585  | VTI1A          | vesicle transport through interaction with t-SNAREs homolog 1A (yeast)                                           |  |
| lys158 | chr10 | 114753978 | 114754277 | NM_030756    | 53981   | TCF7L2         | transcription factor 7-like 2 (T-cell specific, HMG-box)                                                         |  |
| lys159 | chr10 | 114769449 | 114769885 | NM_030756    | 69452   | TCF7L2         | transcription factor 7-like 2 (T-cell specific, HMG-box)                                                         |  |
| lys160 | chr10 | 119141474 | 119141683 | NM_173791    | 16548   | PDZD8          | PDZ domain containing 8                                                                                          |  |
| lys161 | chr10 | 121020568 | 121020875 | NM_005308    | 63383   | GRK5           | G protein-coupled receptor kinase 5                                                                              |  |
| lys162 | chr10 | 121066273 | 121066524 | NM_005308    | 109088  | GRK5           | G protein-coupled receptor kinase 5                                                                              |  |
| lys163 | chr10 | 124060248 | 124060596 | NM_144587    | 39439   | BTBD16         | BTB (POZ) domain containing 16                                                                                   |  |
| lys164 | chr10 | 126403347 | 126403566 | NM_014661    | -19354  | FAM53B         | family with sequence similarity 53, member B                                                                     |  |
| lys165 | chr10 | 128721861 | 128722412 | NM_001380    | 137850  | DOCK1          | dedicator of cytokinesis 1                                                                                       |  |
| lys166 | chr10 | 135023111 | 135023896 | NM_198472    | 1593    | C10orf125      | chromosome 10 open reading frame 125                                                                             |  |
| lys167 | chr11 | 1632421   | 1632735   | NR_026643    | -10669  | FAM99A         | family with sequence similarity 99, member A                                                                     |  |
| lys168 | chr11 | 1667806   | 1667909   | NR_026642    | 4372    | FAM99B         | family with sequence similarity 99, member B                                                                     |  |
| lys169 | chr11 | 1668855   | 1669582   | NM_001012416 | -5418   | KRTAP5-6       | keratin associated protein 5-6                                                                                   |  |
| lys170 | chr11 | 1930545   | 1931170   | NM_021134    | 5469    | MRPL23         | mitochondrial ribosomal protein L23                                                                              |  |
| lys171 | chr11 | 1965433   | 1965671   | NR_024471    | -2055   | LOC100133545   | -                                                                                                                |  |
| lys172 | chr11 | 1965750   | 1966887   | NR_024471    | -839    | LOC100133545   | -                                                                                                                |  |
| lys173 | chr11 | 2180242   | 2180654   |              |         |                |                                                                                                                  |  |
| lys174 | chr11 | 2191324   | 2191679   |              |         |                |                                                                                                                  |  |
| lys175 | chr11 | 2710305   | 2710772   | NM_181798    | 271047  | KCNQ1          | potassium voltage-gated channel, KQT-like subfamily, member 1                                                    |  |
| lys176 | chr11 | 3910832   | 3911202   | NM_003156    | 77325   | STIM1          | stromal interaction molecule 1                                                                                   |  |
| lys177 | chr11 | 6632374   | 6632852   | NM_003737    | -798    | DCHS1          | dachsous 1 (Drosophila)                                                                                          |  |
| lys178 | chr11 | 7583369   | 7583773   | NM_003621    | 91794   | PPF1BP2        | PTPRF interacting protein, binding protein 2 (liprin beta 2)                                                     |  |
| lys179 | chr11 | 12045220  | 12045543  |              |         |                |                                                                                                                  |  |
| lys180 | chr11 | 12670837  | 12671099  | NM_021961    | 18294   | TEAD1          | TEA domain family member 1 (SV40 transcriptional enhancer factor)                                                |  |
| lys181 | chr11 | 12823897  | 12824440  | NM_021961    | 171354  | TEAD1          | TEA domain family member 1 (SV40 transcriptional enhancer factor)                                                |  |
| lys182 | chr11 | 13118327  | 13118977  |              |         |                |                                                                                                                  |  |
| lys183 | chr11 | 16963518  | 16963786  | NM_175058    | -28753  | PLEKHA7        | pleckstrin homology domain containing, family A member 7                                                         |  |
| lys184 | chr11 | 17329660  | 17329962  | NR_026750    | 0       | KCFZp686024166 | -                                                                                                                |  |
| lys185 | chr11 | 17748133  | 17748619  | NM_004976    | 34064   | KCNK1          | potassium voltage-gated channel, Shaw-related subfamily, member 1                                                |  |
| lys186 | chr11 | 18374053  | 18374317  | NM_001135239 | 1543    | LDHA           | lactate dehydrogenase A                                                                                          |  |

|        |       |           |           |              |        |            |                                                                                            |
|--------|-------|-----------|-----------|--------------|--------|------------|--------------------------------------------------------------------------------------------|
| lys187 | chr11 | 20014310  | 20014765  | NM_001111019 | 13100  | NAV2       | neuron navigator 2                                                                         |
| lys188 | chr11 | 44221855  | 44222139  | NM_000401    | 148182 | EXT2       | exostosin 2                                                                                |
| lys189 | chr11 | 60379971  | 60380680  | NM_004778    | 0      | GPR44      | G protein-coupled receptor 44                                                              |
| lys190 | chr11 | 60858404  | 60858929  | NM_001923    | 1163   | DDB1       | damage-specific DNA binding protein 1, 127kDa                                              |
| lys191 | chr11 | 61133393  | 61133765  | NR_002775    | -5318  | RPLP0P2    | ribosomal protein, large, P0 pseudogene 2                                                  |
| lys192 | chr11 | 61497004  | 61497696  | NM_002032    | 5297   | FTH1       | ferritin, heavy polypeptide 1                                                              |
| lys193 | chr11 | 62414748  | 62414914  | NM_001013251 | 9887   | SLC3A2     | solute carrier family 3 (activators of dibasic and neutral amino acid transport), member 2 |
| lys194 | chr11 | 63443119  | 63443807  | NM_173587    | 2228   | RCOR2      | REST corepressor 2                                                                         |
| lys195 | chr11 | 63882956  | 63883329  | NM_001006944 | 0      | RPS6KA4    | ribosomal protein S6 kinase, 90kDa, polypeptide 4                                          |
| lys196 | chr11 | 64409564  | 64409999  | NM_006795    | 6798   | EHD1       | EH-domain containing 1                                                                     |
| lys197 | chr11 | 66967542  | 66968005  | NM_001018070 | 0      | CORO1B     | coronin, actin binding protein, 1B                                                         |
| lys198 | chr11 | 67540896  | 67541156  | NM_000694    | 6532   | ALDH3B1    | aldehyde dehydrogenase 3 family, member B1                                                 |
| lys199 | chr11 | 67669306  | 67669787  | NM_017635    | -67573 | SUV420H1   | suppressor of variegation 4-20 homolog 1 (Drosophila)                                      |
| lys200 | chr11 | 67822198  | 67822542  | NM_002335    | -14141 | LRP5       | low density lipoprotein receptor-related protein 5                                         |
| lys201 | chr11 | 69494023  | 69494470  |              |        |            |                                                                                            |
| lys202 | chr11 | 71786679  | 71787545  | NM_030813    | -35671 | CLPB       | ClpB caseinolytic peptidase B homolog (E. coli)                                            |
| lys203 | chr11 | 72166450  | 72167003  | NM_006645    | -15395 | STARD10    | StAR-related lipid transfer (START) domain containing 10                                   |
| lys204 | chr11 | 73474300  | 73474626  | NM_015531    | -85086 | C2CD3      | C2 calcium-dependent domain containing 3                                                   |
| lys205 | chr11 | 75132536  | 75132851  | NM_025098    | 25956  | MOGAT2     | monoacylglycerol O-acyltransferase 2                                                       |
| lys206 | chr11 | 75151544  | 75151840  | NM_032564    | -5585  | DGAT2      | diacylglycerol O-acyltransferase homolog 2 (mouse)                                         |
| lys207 | chr11 | 75157035  | 75157238  | NM_032564    | -187   | DGAT2      | diacylglycerol O-acyltransferase homolog 2 (mouse)                                         |
| lys208 | chr11 | 76158247  | 76158681  | NM_015516    | -13251 | TSKU       | tsukushi small leucine rich proteoglycan homolog (Xenopus laevis)                          |
| lys209 | chr11 | 77425795  | 77426067  | NM_023930    | 13828  | KCTD14     | potassium channel tetramerisation domain containing 14                                     |
| lys210 | chr11 | 77545094  | 77545578  | NM_024079    | 16748  | ALG8       | asparagine-linked glycosylation 8, alpha-1,3-glucosyltransferase homolog (S. cerevisiae)   |
| lys211 | chr11 | 77678986  | 77679231  | NM_012296    | -51343 | GAB2       | GRB2-associated binding protein 2                                                          |
| lys212 | chr11 | 92859930  | 92860336  | NM_020179    | -55858 | C11orf75   | chromosome 11 open reading frame 75                                                        |
| lys213 | chr11 | 95762680  | 95762962  | NM_003772    | 0      | JRKL       | jerky homolog-like (mouse)                                                                 |
| lys214 | chr11 | 101998246 | 101998534 | NM_004771    | -2739  | MMP20      | matrix metalloproteinase 20                                                                |
| lys215 | chr11 | 113251389 | 113251905 | NM_020886    | 0      | USP28      | ubiquitin specific peptidase 28                                                            |
| lys216 | chr11 | 115788235 | 115788831 |              |        |            |                                                                                            |
| lys217 | chr11 | 116202716 | 116203189 | NM_000040    | -2644  | APOC3      | apolipoprotein C-III                                                                       |
| lys218 | chr11 | 116204867 | 116205381 | NM_000040    | -452   | APOC3      | apolipoprotein C-III                                                                       |
| lys219 | chr11 | 116209669 | 116210034 | NM_000039    | -3514  | APOA1      | apolipoprotein A-I                                                                         |
| lys220 | chr11 | 116213293 | 116214119 | NM_000039    | 0      | APOA1      | apolipoprotein A-I                                                                         |
| lys221 | chr11 | 116216759 | 116217161 | NM_000039    | 3212   | APOA1      | apolipoprotein A-I                                                                         |
| lys222 | chr11 | 116397096 | 116397476 | NM_025164    | -76727 | QSK        | SIK family kinase 3                                                                        |
| lys223 | chr11 | 117472001 | 117472319 | NM_019894    | 19066  | TMPRSS4    | transmembrane protease, serine 4                                                           |
| lys224 | chr11 | 120184455 | 120184881 | NM_014619    | 148219 | GRIK4      | glutamate receptor, ionotropic, kainate 4                                                  |
| lys225 | chr11 | 125568188 | 125568400 | NM_001144827 | -18397 | RPUSD4     | RNA pseudouridylation synthase domain containing 4                                         |
| lys226 | chr11 | 134118085 | 134118365 |              |        |            |                                                                                            |
| lys227 | chr12 | 189736    | 190038    | NM_003044    | -2715  | SLC6A12    | solute carrier family 6 (neurotransmitter transporter, betaine/GABA), member 12            |
| lys228 | chr12 | 625995    | 626411    | NM_016533    | -16605 | NINJ2      | ninjurin 2                                                                                 |
| lys229 | chr12 | 1639739   | 1639991   | NM_032642    | 31068  | WNT5B      | wingless-type MMTV integration site family, member 5B                                      |
| lys230 | chr12 | 2227530   | 2227860   | NM_001129835 | 194855 | CACNA1C    | calcium channel, voltage-dependent, L type, alpha 1C subunit                               |
| lys231 | chr12 | 6513283   | 6513963   | NM_002046    | 0      | GAPDH      | glyceraldehyde-3-phosphate dehydrogenase                                                   |
| lys232 | chr12 | 9166012   | 9166434   | NM_000014    | 6188   | A2M        | alpha-2-macroglobulin                                                                      |
| lys233 | chr12 | 9694674   | 9694906   | NR_002814    | 2766   | LOC374443  | -                                                                                          |
| lys234 | chr12 | 10935845  | 10936218  | NM_023920    | -17210 | TAS2R13    | taste receptor, type 2, member 13                                                          |
| lys235 | chr12 | 20595645  | 20595773  | NM_000921    | 182183 | PDE3A      | phosphodiesterase 3A, cGMP-inhibited                                                       |
| lys236 | chr12 | 24798952  | 24799796  |              |        |            |                                                                                            |
| lys237 | chr12 | 26897847  | 26898204  |              |        |            |                                                                                            |
| lys238 | chr12 | 46707809  | 46708063  | NM_014554    | -77845 | SENP1      | SUMO1/sentrin specific peptidase 1                                                         |
| lys239 | chr12 | 47490934  | 47491181  | NM_000725    | -7597  | CACNB3     | calcium channel, voltage-dependent, beta 3 subunit                                         |
| lys240 | chr12 | 48782743  | 48783010  | NM_005276    | -1057  | GPD1       | glycerol-3-phosphate dehydrogenase 1 (soluble)                                             |
| lys241 | chr12 | 51729653  | 51730216  | NM_170754    | 0      | TENC1      | tensin like C1 domain containing phosphatase (tensin 2)                                    |
| lys242 | chr12 | 51731230  | 51731545  | NM_170754    | 1130   | TENC1      | tensin like C1 domain containing phosphatase (tensin 2)                                    |
| lys243 | chr12 | 51731582  | 51731896  | NM_170754    | 1482   | TENC1      | tensin like C1 domain containing phosphatase (tensin 2)                                    |
| lys244 | chr12 | 52306407  | 52306841  | NM_006856    | 0      | ATF7       | activating transcription factor 7                                                          |
| lys245 | chr12 | 54396006  | 54396228  | NM_001487    | 0      | BLOC1S1    | biogenesis of lysosomal organelles complex-1, subunit 1                                    |
| lys246 | chr12 | 54761833  | 54762347  | NM_001005915 | 1676   | ERBB3      | v-erb-b2 erythroblastic leukemia viral oncogene homolog 3 (avian)                          |
| lys247 | chr12 | 56131386  | 56131864  | NM_031479    | -3498  | INHBE      | inhibin, beta E                                                                            |
| lys248 | chr12 | 56134549  | 56134883  | NM_031479    | -479   | INHBE      | inhibin, beta E                                                                            |
| lys249 | chr12 | 70120955  | 70121378  | NM_003667    | 877    | LGR5       | leucine-rich repeat-containing G protein-coupled receptor 5                                |
| lys250 | chr12 | 88275253  | 88275698  | NM_022652    | 4827   | DUSP6      | dual specificity phosphatase 6                                                             |
| lys251 | chr12 | 92005240  | 92005632  |              |        |            |                                                                                            |
| lys252 | chr12 | 92020606  | 92021011  |              |        |            |                                                                                            |
| lys253 | chr12 | 92191718  | 92192306  |              |        |            |                                                                                            |
| lys254 | chr12 | 93489476  | 93489805  | NM_020698    | -78650 | TMCC3      | transmembrane and coiled-coil domain family 3                                              |
| lys255 | chr12 | 96193255  | 96193502  |              |        |            |                                                                                            |
| lys256 | chr12 | 97616829  | 97617064  | NM_181861    | 53622  | APAF1      | apoptotic peptidase activating factor 1                                                    |
| lys257 | chr12 | 99355364  | 99355637  | NM_139319    | 80378  | SLC17A8    | solute carrier family 17 (sodium-dependent inorganic phosphate cotransporter), member 8    |
| lys258 | chr12 | 100536126 | 100536524 | NM_206821    | 23250  | MYBPC1     | myosin binding protein C, slow type                                                        |
| lys259 | chr12 | 103206652 | 103207163 | NM_182742    | 1797   | TXNRD1     | thioredoxin reductase 1                                                                    |
| lys260 | chr12 | 105892552 | 105892748 | NM_001033050 | -12311 | MTERFD3    | MTERF domain containing 3                                                                  |
| lys261 | chr12 | 106270197 | 106270532 | NM_001018072 | 33872  | BTBD11     | BTB (POZ) domain containing 11                                                             |
| lys262 | chr12 | 108511076 | 108511331 | NM_000431    | 15195  | MVK        | mevalonate kinase                                                                          |
| lys263 | chr12 | 108871241 | 108871595 | NM_014776    | -46982 | GIT2       | G protein-coupled receptor kinase interacting ArfGAP 2                                     |
| lys264 | chr12 | 115481656 | 115481982 | NM_001085481 | 89     | MAMP1LC3B2 | microtubule-associated protein 1 light chain 3 beta 2                                      |
| lys265 | chr12 | 116906235 | 116906465 | NM_173598    | 15825  | KSR2       | kinase suppressor of ras 2                                                                 |
| lys266 | chr12 | 119188031 | 119188385 | NM_001080855 | 86     | PXN        | paxillin                                                                                   |
| lys267 | chr12 | 119826323 | 119826683 | NM_139015    | 0      | SPPL3      | -                                                                                          |
| lys268 | chr12 | 120008059 | 120008266 |              |        |            |                                                                                            |
| lys269 | chr12 | 120459195 | 120459718 | NM_001005366 | -43029 | KDM2B      | lysine (K)-specific demethylase 2B                                                         |
| lys270 | chr12 | 121916878 | 121917070 | NM_024667    | -29595 | VPS37B     | vacuolar protein sorting 37 homolog B (S. cerevisiae)                                      |
| lys271 | chr12 | 122343848 | 122344390 | NM_018183    | -56551 | SBNO1      | strawberry notch homolog 1 (Drosophila)                                                    |
| lys272 | chr12 | 122880132 | 122880396 | NM_207437    | 67139  | DNAH10     | dynein, axonemal, heavy chain 10                                                           |
| lys273 | chr12 | 126216822 | 126216975 |              |        |            |                                                                                            |
| lys274 | chr12 | 129876853 | 129877115 | NM_001980    | -12649 | STX2       | syntaxin 2                                                                                 |
| lys275 | chr12 | 130911289 | 130911648 | NM_016155    | 32397  | MMP17      | matrix metalloproteinase 17 (membrane-inserted)                                            |
| lys276 | chr12 | 131135410 | 131135696 | NR_003290    | 631    | EP400NL    | EP400 N-terminal like                                                                      |

|        |       |           |           |              |         |           |                                                                                      |
|--------|-------|-----------|-----------|--------------|---------|-----------|--------------------------------------------------------------------------------------|
| lys277 | chr12 | 131694868 | 131695220 | NM_174873    | -10255  | P2RX2     | purinergic receptor P2X, ligand-gated ion channel, 2                                 |
| lys278 | chr13 | 19069090  | 19069312  |              |         |           |                                                                                      |
| lys279 | chr13 | 23042403  | 23043055  | NM_148957    | 0       | TNFRSF19  | tumor necrosis factor receptor superfamily, member 19                                |
| lys280 | chr13 | 23689799  | 23690092  | NM_153023    | 56914   | SPATA13   | spermatogenesis associated 13                                                        |
| lys281 | chr13 | 29396136  | 29396547  |              |         |           |                                                                                      |
| lys282 | chr13 | 30277297  | 30277636  |              |         |           |                                                                                      |
| lys283 | chr13 | 33440974  | 33441493  | NM_181558    | 150770  | RFC3      | replication factor C (activator 1) 3, 38kDa                                          |
| lys284 | chr13 | 48775711  | 48776120  | NM_030911    | 55609   | CDADC1    | cytidine and dCMP deaminase domain containing 1                                      |
| lys285 | chr13 | 97758429  | 97758732  | NM_005766    | 164996  | FARP1     | FERM, RhoGEF (ARHGEF) and pleckstrin domain protein 1 (chondrocyte-derived)          |
| lys286 | chr13 | 97956989  | 97957437  | NM_003576    | -14905  | STK24     | serine/threonine kinase 24 (STE20 homolog, yeast)                                    |
| lys287 | chr13 | 112459425 | 112459840 | NM_032189    | 66783   | ATP11A    | ATPase, class VI, type 11A                                                           |
| lys288 | chr13 | 112595883 | 112596278 | NM_032189    | 203241  | ATP11A    | ATPase, class VI, type 11A                                                           |
| lys289 | chr13 | 112712029 | 112712369 | NM_024979    | 30375   | MCF2L     | MCF.2 cell line derived transforming sequence-like                                   |
| lys290 | chr13 | 112999267 | 112999605 | NM_005561    | 0       | LAMP1     | lysosomal-associated membrane protein 1                                              |
| lys291 | chr14 | 20224442  | 20224790  | NM_001097577 | -1981   | ANG       | angiogenin, ribonuclease, RNase A family, 5                                          |
| lys292 | chr14 | 43855957  | 43856199  |              |         |           |                                                                                      |
| lys293 | chr14 | 49178275  | 49178644  | NM_001083908 | 6578    | C14orf104 | chromosome 14 open reading frame 104                                                 |
| lys294 | chr14 | 54639650  | 54640049  |              |         |           |                                                                                      |
| lys295 | chr14 | 61073961  | 61074536  | NM_006255    | 215695  | PRKCH     | protein kinase C, eta                                                                |
| lys296 | chr14 | 69226477  | 69227004  | NM_014734    | 78416   | KIAA0247  | KIAA0247                                                                             |
| lys297 | chr14 | 73308325  | 73308717  | NM_194278    | 11572   | C14orf43  | chromosome 14 open reading frame 43                                                  |
| lys298 | chr14 | 87580218  | 87580693  |              |         |           |                                                                                      |
| lys299 | chr14 | 88576823  | 88577250  |              |         |           |                                                                                      |
| lys300 | chr14 | 88768446  | 88768889  | NM_005197    | -184318 | FOXN3     | forkhead box N3                                                                      |
| lys301 | chr14 | 88887606  | 88888005  | NM_005197    | -65202  | FOXN3     | forkhead box N3                                                                      |
| lys302 | chr14 | 90038233  | 90038569  |              |         |           |                                                                                      |
| lys303 | chr14 | 91493987  | 91494285  | NM_006329    | 10189   | FBLN5     | fibulin 5                                                                            |
| lys304 | chr14 | 92441950  | 92442181  | NM_001275    | -17016  | CHGA      | chromogranin A (parathyroid secretory protein 1)                                     |
| lys305 | chr14 | 93438775  | 93439405  | NM_138344    | -15605  | FAM181A   | family with sequence similarity 181, member A                                        |
| lys306 | chr14 | 93495463  | 93495779  | NM_016150    | 1944    | ASB2      | ankyrin repeat and SOCS box-containing 2                                             |
| lys307 | chr14 | 93813381  | 93813624  | NM_016186    | -15490  | SERPINA10 | serpin peptidase inhibitor, clade A (alpha-1 antiproteinase, antitrypsin), member 10 |
| lys308 | chr14 | 94134906  | 94136095  | NM_001085    | -12371  | SERPINA3  | serpin peptidase inhibitor, clade A (alpha-1 antiproteinase, antitrypsin), member 3  |
| lys309 | chr14 | 95059348  | 95059870  | NR_003002    | -9849   | SCARNA13  | small Cajal body-specific RNA 13                                                     |
| lys310 | chr14 | 95060879  | 95061250  | NR_003002    | -8469   | SCARNA13  | small Cajal body-specific RNA 13                                                     |
| lys311 | chr14 | 98852332  | 98852959  |              |         |           |                                                                                      |
| lys312 | chr14 | 99088604  | 99089083  | NM_001144995 | -51397  | CCDC85C   | coiled-coil domain containing 85C                                                    |
| lys313 | chr14 | 99102549  | 99102895  | NM_001144995 | -37585  | CCDC85C   | coiled-coil domain containing 85C                                                    |
| lys314 | chr14 | 99138319  | 99138548  | NM_001144995 | -1932   | CCDC85C   | coiled-coil domain containing 85C                                                    |
| lys315 | chr14 | 100353305 | 100353910 | NR_003531    | -8287   | MEG3      | maternally expressed 3 (non-protein coding)                                          |
| lys316 | chr14 | 100825278 | 100825683 |              |         |           |                                                                                      |
| lys317 | chr14 | 103417429 | 103417767 |              |         |           |                                                                                      |
| lys318 | chr15 | 38177941  | 38178592  | NM_001003943 | -6987   | BMF       | Bcl2 modifying factor                                                                |
| lys319 | chr15 | 39081026  | 39081283  | NM_017553    | -114349 | INO80     | INO80 homolog (S. cerevisiae)                                                        |
| lys320 | chr15 | 43469638  | 43469793  | NM_001482    | 11367   | GATM      | glycine amidinotransferase (L-arginine:glycine amidinotransferase)                   |
| lys321 | chr15 | 43666621  | 43667038  | NM_012388    | 0       | PLDN      | pallidin homolog (mouse)                                                             |
| lys322 | chr15 | 48766158  | 48766500  | NM_017672    | 0       | TRPM7     | transient receptor potential cation channel, subfamily M, member 7                   |
| lys323 | chr15 | 48798198  | 48798589  | NM_032802    | -46613  | SPPL2A    | -                                                                                    |
| lys324 | chr15 | 51534685  | 51535305  |              |         |           |                                                                                      |
| lys325 | chr15 | 51910562  | 51910694  |              |         |           |                                                                                      |
| lys326 | chr15 | 54120001  | 54120307  |              |         |           |                                                                                      |
| lys327 | chr15 | 56361899  | 56362224  |              |         |           |                                                                                      |
| lys328 | chr15 | 56548303  | 56548524  | NM_000236    | 36838   | LIPC      | lipase, hepatic                                                                      |
| lys329 | chr15 | 56626151  | 56626731  | NM_000236    | 114686  | LIPC      | lipase, hepatic                                                                      |
| lys330 | chr15 | 60891500  | 60891767  | NM_015059    | 164700  | TLN2      | talin 2                                                                              |
| lys331 | chr15 | 61545633  | 61546013  |              |         |           |                                                                                      |
| lys332 | chr15 | 63069061  | 63069405  | NM_016630    | 0       | SPG21     | spastic paraplegia 21 (autosomal recessive, Mast syndrome)                           |
| lys333 | chr15 | 63124143  | 63124459  | NM_178859    | -4906   | OSTbeta   | -                                                                                    |
| lys334 | chr15 | 65963945  | 65964465  |              |         |           |                                                                                      |
| lys335 | chr15 | 68158146  | 68158467  | NM_005078    | -18843  | TLE3      | transducin-like enhancer of split 3 (E(sp1) homolog, Drosophila)                     |
| lys336 | chr15 | 68696442  | 68696933  |              |         |           |                                                                                      |
| lys337 | chr15 | 70455314  | 70455567  | NR_027262    | 0       | C15orf34  | chromosome 15 open reading frame 34                                                  |
| lys338 | chr15 | 76144696  | 76145118  | NM_015079    | -11931  | TBC1D2B   | TBC1 domain family, member 2B                                                        |
| lys339 | chr15 | 77067945  | 77068273  | NM_153815    | -16784  | RASGRF1   | Ras protein-specific guanine nucleotide-releasing factor 1                           |
| lys340 | chr15 | 77073245  | 77073990  | NM_153815    | -11067  | RASGRF1   | Ras protein-specific guanine nucleotide-releasing factor 1                           |
| lys341 | chr15 | 78884250  | 78884936  | NM_018689    | 25485   | KIAA1199  | KIAA1199                                                                             |
| lys342 | chr15 | 82995649  | 82995913  | NM_032856    | -2612   | WDR73     | WD repeat domain 73                                                                  |
| lys343 | chr15 | 88034772  | 88035128  | NM_020212    | 0       | WDR93     | WD repeat domain 93                                                                  |
| lys344 | chr15 | 88347517  | 88347972  | NM_198526    | 1763    | ZNF710    | zinc finger protein 710                                                              |
| lys345 | chr15 | 88470971  | 88471247  |              |         |           |                                                                                      |
| lys346 | chr15 | 89298862  | 89299276  | NM_001017919 | 0       | RCCD1     | RCC1 domain containing 1                                                             |
| lys347 | chr15 | 94605881  | 94606302  |              |         |           |                                                                                      |
| lys348 | chr15 | 96304516  | 96304998  | NM_183376    | 0       | ARRDC4    | arrestin domain containing 4                                                         |
| lys349 | chr15 | 98521752  | 98521989  | NM_139057    | -177717 | ADAMTS17  | ADAM metalloproteinase with thrombospondin type 1 motif, 17                          |
| lys350 | chr15 | 99609563  | 99609956  | NM_014918    | 0       | CHSY1     | chondroitin sulfate synthase 1                                                       |
| lys351 | chr15 | 99797123  | 99797643  | NM_002570    | -50067  | PCSK6     | proprotein convertase subtilisin/kexin type 6                                        |
| lys352 | chr15 | 99974237  | 99974591  |              |         |           |                                                                                      |
| lys353 | chr16 | 395725    | 396072    | NM_020664    | 3868    | DEC2      | 2,4-dienoyl CoA reductase 2, peroxisomal                                             |
| lys354 | chr16 | 729791    | 730162    | NM_022493    | -836    | NARFL     | nuclear prelamin A recognition factor-like                                           |
| lys355 | chr16 | 1072214   | 1072538   | NM_001053    | 3434    | SSTR5     | somatostatin receptor 5                                                              |
| lys356 | chr16 | 1081248   | 1081660   | NM_207419    | -4585   | C1QTNF8   | C1q and tumor necrosis factor related protein 8                                      |
| lys357 | chr16 | 1464956   | 1465261   | NM_001114331 | 0       | CLCN7     | chloride channel 7                                                                   |
| lys358 | chr16 | 1817099   | 1817319   | NM_005326    | 0       | HAGH      | hydroxyacylglutathione hydrolase                                                     |
| lys359 | chr16 | 1823074   | 1823514   | NM_031208    | 5850    | FAHD1     | fumarylacetoacetate hydrolase domain containing 1                                    |
| lys360 | chr16 | 2138376   | 2138617   | NM_014353    | -34     | RAB26     | RAB26, member RAS oncogene family                                                    |
| lys361 | chr16 | 2195682   | 2196057   | NM_022372    | 233     | MLST8     | MTOR associated protein, LST8 homolog (S. cerevisiae)                                |
| lys362 | chr16 | 2205215   | 2205467   | NM_001042371 | 393     | PGP       | phosphoglycolate phosphatase                                                         |
| lys363 | chr16 | 2510151   | 2510534   | NM_015944    | 0       | AMDHD2    | amidohydrolase domain containing 2                                                   |
| lys364 | chr16 | 4099302   | 4099711   | NM_001116    | -6476   | ADCY9     | adenylate cyclase 9                                                                  |
| lys365 | chr16 | 4653681   | 4654400   | NM_015246    | 38856   | MGRN1     | mahogunin, ring finger 1                                                             |
| lys366 | chr16 | 8988817   | 8989094   |              |         |           |                                                                                      |
| lys367 | chr16 | 10649180  | 10649626  | NM_144674    | -46677  | TEKT5     | tektin 5                                                                             |
| lys368 | chr16 | 11613739  | 11614157  |              |         |           |                                                                                      |
| lys369 | chr16 | 19460963  | 19461341  | NM_020314    | -13199  | C16orf62  | chromosome 16 open reading frame 62                                                  |
| lys370 | chr16 | 20517650  | 20517926  |              |         |           |                                                                                      |

|        |       |          |          |              |         |          |                                                                                                        |
|--------|-------|----------|----------|--------------|---------|----------|--------------------------------------------------------------------------------------------------------|
| lys371 | chr16 | 22124772 | 22125210 | NM_013302    | 0       | EEF2K    | eukaryotic elongation factor-2 kinase                                                                  |
| lys372 | chr16 | 29999741 | 30000159 | NM_002720    | 4858    | PPP4C    | protein phosphatase 4, catalytic subunit                                                               |
| lys373 | chr16 | 31024578 | 31024997 | NM_001122957 | -2165   | BCKDK    | branched chain ketoacid dehydrogenase kinase                                                           |
| lys374 | chr16 | 33870004 | 33870183 |              |         |          |                                                                                                        |
| lys375 | chr16 | 33870280 | 33870497 |              |         |          |                                                                                                        |
| lys376 | chr16 | 33870566 | 33870896 |              |         |          |                                                                                                        |
| lys377 | chr16 | 33871402 | 33871616 |              |         |          |                                                                                                        |
| lys378 | chr16 | 33872325 | 33872493 |              |         |          |                                                                                                        |
| lys379 | chr16 | 33873058 | 33873144 |              |         |          |                                                                                                        |
| lys380 | chr16 | 45473666 | 45474604 | NM_133443    | -1204   | GPT2     | glutamic pyruvate transaminase (alanine aminotransferase) 2                                            |
| lys381 | chr16 | 47033240 | 47033498 |              |         |          |                                                                                                        |
| lys382 | chr16 | 49037133 | 49037382 |              |         |          |                                                                                                        |
| lys383 | chr16 | 50989956 | 50990372 |              |         |          |                                                                                                        |
| lys384 | chr16 | 51647938 | 51648198 | NM_025134    | 1494    | CHD9     | chromodomain helicase DNA binding protein 9                                                            |
| lys385 | chr16 | 52357915 | 52358176 | NM_001080432 | 62541   | FTO      | fat mass and obesity associated                                                                        |
| lys386 | chr16 | 52859848 | 52860120 | NM_024336    | -17759  | IRX3     | iroquois homeobox 3                                                                                    |
| lys387 | chr16 | 54214505 | 54214898 |              |         |          |                                                                                                        |
| lys388 | chr16 | 57312366 | 57312902 | NM_002080    | -12845  | GOT2     | glutamic-oxaloacetic transaminase 2, mitochondrial (aspartate aminotransferase 2)                      |
| lys389 | chr16 | 65756002 | 65756271 | NM_001538    | 1215    | HSF4     | heat shock transcription factor 4                                                                      |
| lys390 | chr16 | 67383925 | 67384390 | NM_004360    | 55231   | CDH1     | cadherin 1, type 1, E-cadherin (epithelial)                                                            |
| lys391 | chr16 | 67384426 | 67384716 | NM_004360    | 55732   | CDH1     | cadherin 1, type 1, E-cadherin (epithelial)                                                            |
| lys392 | chr16 | 67995777 | 67996230 | NM_005652    | 18404   | TERF2    | telomeric repeat binding factor 2                                                                      |
| lys393 | chr16 | 69337461 | 69337833 | NM_018052    | -54729  | VAC14    | Vac14 homolog (S. cerevisiae)                                                                          |
| lys394 | chr16 | 69338049 | 69338421 | NM_018052    | -54141  | VAC14    | Vac14 homolog (S. cerevisiae)                                                                          |
| lys395 | chr16 | 70608403 | 70608864 | NM_001361    | 8261    | DHODH    | dihydroorotate dehydrogenase                                                                           |
| lys396 | chr16 | 73582860 | 73583376 | NM_030581    | 6343    | WDR59    | WD repeat domain 59                                                                                    |
| lys397 | chr16 | 73896618 | 73897128 | NM_006324    | -127760 | CFDP1    | craniofacial development protein 1                                                                     |
| lys398 | chr16 | 73901249 | 73901696 | NM_006324    | -123192 | CFDP1    | craniofacial development protein 1                                                                     |
| lys399 | chr16 | 76888463 | 76888745 | NM_016373    | 197413  | WWOX     | WW domain containing oxidoreductase                                                                    |
| lys400 | chr16 | 80035704 | 80036325 | NM_198390    | 0       | CMIP     | -                                                                                                      |
| lys401 | chr16 | 82534030 | 82534280 | NM_182980    | -5892   | OSGIN1   | oxidative stress induced growth inhibitor 1                                                            |
| lys402 | chr16 | 82544082 | 82544504 | NM_182981    | 0       | OSGIN1   | oxidative stress induced growth inhibitor 1                                                            |
| lys403 | chr16 | 83006178 | 83006444 | NM_014861    | 46546   | ATP2C2   | ATPase, Ca++ transporting, type 2C, member 2                                                           |
| lys404 | chr16 | 83442376 | 83442772 | NM_031476    | 31290   | CRISPLD2 | cysteine-rich secretory protein LCCL domain containing 2                                               |
| lys405 | chr16 | 83882605 | 83882955 |              |         |          |                                                                                                        |
| lys406 | chr16 | 84144159 | 84144695 |              |         |          |                                                                                                        |
| lys407 | chr16 | 86434036 | 86434452 | NM_003486    | -26149  | SLC7A5   | solute carrier family 7 (cationic amino acid transporter, y+ system), member 5                         |
| lys408 | chr16 | 86438545 | 86439344 | NM_003486    | -21257  | SLC7A5   | solute carrier family 7 (cationic amino acid transporter, y+ system), member 5                         |
| lys409 | chr16 | 87081840 | 87082345 | NM_153813    | 34327   | ZFPM1    | zinc finger protein, multitype 1                                                                       |
| lys410 | chr16 | 87810362 | 87810656 | NM_182531    | -955    | ZNF778   | zinc finger protein 778                                                                                |
| lys411 | chr16 | 87989106 | 87989555 | NM_013275    | -94915  | ANKRD11  | ankyrin repeat domain 11                                                                               |
| lys412 | chr16 | 88281057 | 88281549 | NM_001098533 | 482     | CDK10    | cyclin-dependent kinase 10                                                                             |
| lys413 | chr16 | 88431527 | 88431936 | NM_032451    | 9121    | SPIRE2   | spire homolog 2 (Drosophila)                                                                           |
| lys414 | chr16 | 88512384 | 88512845 | NM_002386    | 598     | MC1R     | melanocortin 1 receptor (alpha melanocyte stimulating hormone receptor)                                |
| lys415 | chr17 | 198434   | 198677   | NM_006987    | -3899   | RPH3AL   | rabphilin 3A-like (without C2 domains)                                                                 |
| lys416 | chr17 | 243631   | 243949   | NM_001013672 | -16484  | C17orf97 | chromosome 17 open reading frame 97                                                                    |
| lys417 | chr17 | 632159   | 632505   | NM_016080    | 0       | GLOD4    | glyoxalase domain containing 4                                                                         |
| lys418 | chr17 | 785455   | 785813   | NM_022463    | -43947  | NXN      | nucleoredoxin                                                                                          |
| lys419 | chr17 | 1574543  | 1574825  | NM_001001870 | 8289    | C17orf91 | chromosome 17 open reading frame 91                                                                    |
| lys420 | chr17 | 1585926  | 1586935  | NM_000934    | -5944   | SERPINF2 | serpin peptidase inhibitor, clade F (alpha-2 antiplasmin, pigment epithelium derived factor), member 2 |
| lys421 | chr17 | 1586980  | 1587287  | NM_000934    | -5592   | SERPINF2 | serpin peptidase inhibitor, clade F (alpha-2 antiplasmin, pigment epithelium derived factor), member 2 |
| lys422 | chr17 | 1796193  | 1796483  | NM_178568    | -78445  | RTN4RL1  | reticulon 4 receptor-like 1                                                                            |
| lys423 | chr17 | 1916625  | 1917118  | NM_001098202 | 10273   | HIC1     | hypermethylated in cancer 1                                                                            |
| lys424 | chr17 | 3652921  | 3653392  | NM_002208    | 1636    | ITGAE    | integrin, alpha E (antigen CD103, human mucosal lymphocyte antigen 1; alpha polypeptide)               |
| lys425 | chr17 | 4331376  | 4331752  | NM_001124758 | -17125  | SPNS2    | spinster homolog 2 (Drosophila)                                                                        |
| lys426 | chr17 | 4410861  | 4411167  | NM_153338    | 237     | GGT6     | gamma-glutamyltransferase 6                                                                            |
| lys427 | chr17 | 7078457  | 7078801  | NM_004422    | 0       | DVL2     | dishevelled, dsh homolog 2 (Drosophila)                                                                |
| lys428 | chr17 | 7680796  | 7681197  | NM_001080424 | -2762   | KDM6B    | lysine (K)-specific demethylase 6B                                                                     |
| lys429 | chr17 | 14217153 | 14217700 |              |         |          |                                                                                                        |
| lys430 | chr17 | 16269757 | 16270113 | NM_016113    | 10146   | TRPV2    | transient receptor potential cation channel, subfamily V, member 2                                     |
| lys431 | chr17 | 16922291 | 16922753 | NM_015134    | 35461   | MPRIP    | myosin phosphatase Rho interacting protein                                                             |
| lys432 | chr17 | 17050275 | 17050869 | NM_178836    | 0       | PLD6     | phospholipase D family, member 6                                                                       |
| lys433 | chr17 | 17188826 | 17189182 | NM_020201    | 41423   | NT5M     | 5',3'-nucleotidase, mitochondrial                                                                      |
| lys434 | chr17 | 17382737 | 17383035 | NM_148173    | -38469  | PEMT     | phosphatidylethanolamine N-methyltransferase                                                           |
| lys435 | chr17 | 17674684 | 17675092 | NM_001005291 | -5958   | SREBF1   | sterol regulatory element binding transcription factor 1                                               |
| lys436 | chr17 | 17758077 | 17758333 | NM_001082968 | -58176  | TOM1L2   | target of myb1-like 2 (chicken)                                                                        |
| lys437 | chr17 | 19382421 | 19382729 | NM_018242    | 4664    | SLC47A1  | solute carrier family 47, member 1                                                                     |
| lys438 | chr17 | 19592258 | 19592739 | NM_000691    | 0       | ALDH3A1  | aldehyde dehydrogenase 3 family, member A1                                                             |
| lys439 | chr17 | 19821703 | 19822058 | NM_007202    | 0       | AKAP10   | A kinase (PRKA) anchor protein 10                                                                      |
| lys440 | chr17 | 22683617 | 22683983 | NM_134265    | 38386   | WSB1     | WD repeat and SOCS box-containing 1                                                                    |
| lys441 | chr17 | 23719389 | 23719647 | NM_001083896 | 276     | SEBOX    | SEBOX homeobox                                                                                         |
| lys442 | chr17 | 24527761 | 24528295 | NM_203318    | -3238   | MYO18A   | myosin XVIIIIA                                                                                         |
| lys443 | chr17 | 28173707 | 28174003 | NM_015194    | -54012  | MYO1D    | myosin ID                                                                                              |
| lys444 | chr17 | 30502242 | 30502473 | NM_001033576 | 3295    | UNC45B   | unc-45 homolog B (C. elegans)                                                                          |
| lys445 | chr17 | 33110271 | 33110539 | NM_000458    | -68670  | HNF1B    | HNF1 homeobox B                                                                                        |
| lys446 | chr17 | 33117520 | 33117998 | NM_000458    | -61211  | HNF1B    | HNF1 homeobox B                                                                                        |
| lys447 | chr17 | 34113445 | 34114254 | NM_005937    | -1144   | MLLT6    | myeloid/lymphoid or mixed-lineage leukemia (trithorax homolog, Drosophila); translocated to, 6         |
| lys448 | chr17 | 35149262 | 35149606 | NM_001030002 | 1148    | GRB7     | growth factor receptor-bound protein 7                                                                 |
| lys449 | chr17 | 35482740 | 35483193 | NM_003250    | 10056   | THRA     | thyroid hormone receptor, alpha (erythroblastic leukemia viral (v-erb-a) oncogene homolog, avian)      |
| lys450 | chr17 | 35510391 | 35511317 | NM_021724    | 0       | NR1D1    | nuclear receptor subfamily 1, group D, member 1                                                        |
| lys451 | chr17 | 35517975 | 35518299 | NM_021724    | 7477    | NR1D1    | nuclear receptor subfamily 1, group D, member 1                                                        |
| lys452 | chr17 | 35858431 | 35858893 | NM_001552    | 5231    | IGFBP4   | insulin-like growth factor binding protein 4                                                           |
| lys453 | chr17 | 35961569 | 35962130 | NM_001838    | -13120  | CCR7     | chemokine (C-C motif) receptor 7                                                                       |
| lys454 | chr17 | 38073700 | 38073909 | NM_024927    | -8665   | PLEKHH3  | pleckstrin homology domain containing, family H (with MyTH4 domain) member 3                           |
| lys455 | chr17 | 38083811 | 38084322 | NM_024927    | 1238    | PLEKHH3  | pleckstrin homology domain containing, family H (with MyTH4 domain) member 3                           |

|        |       |          |          |              |         |           |                                                                                        |
|--------|-------|----------|----------|--------------|---------|-----------|----------------------------------------------------------------------------------------|
| lys456 | chr17 | 38283788 | 38284028 | NR_002773    | 11102   | LOC90586  | -                                                                                      |
| lys457 | chr17 | 38291980 | 38292313 | NR_027254    | -11964  | LOC388387 | -                                                                                      |
| lys458 | chr17 | 38299814 | 38300185 | NR_027254    | -4092   | LOC388387 | -                                                                                      |
| lys459 | chr17 | 38326398 | 38326721 | NM_000151    | 20059   | G6PC      | glucose-6-phosphatase, catalytic subunit                                               |
| lys460 | chr17 | 38899048 | 38899240 | NM_004941    | -17619  | DHX8      | DEAH (Asp-Glu-Ala-His) box polypeptide 8                                               |
| lys461 | chr17 | 39211219 | 39211416 | NM_004090    | -478    | DUSP3     | dual specificity phosphatase 3                                                         |
| lys462 | chr17 | 39759748 | 39759992 | NM_001143780 | 2006    | SLC25A39  | solute carrier family 25, member 39                                                    |
| lys463 | chr17 | 41369027 | 41369525 | NM_005910    | 41485   | MAPT      | microtubule-associated protein tau                                                     |
| lys464 | chr17 | 42204464 | 42204831 | NM_030753    | -46250  | WNT3      | wingless-type MMTV integration site family, member 3                                   |
| lys465 | chr17 | 42215749 | 42216081 | NM_030753    | -35000  | WNT3      | wingless-type MMTV integration site family, member 3                                   |
| lys466 | chr17 | 45533822 | 45534176 | NM_002611    | 6129    | PDK2      | pyruvate dehydrogenase kinase, isozyme 2                                               |
| lys467 | chr17 | 45975217 | 45975712 | NM_022827    | -3848   | SPATA20   | spermatogenesis associated 20                                                          |
| lys468 | chr17 | 46068508 | 46069070 | NM_001144070 | 1293    | ABCC3     | ATP-binding cassette, sub-family C (CFTR/MRP), member 3                                |
| lys469 | chr17 | 46326010 | 46326296 |              |         |           |                                                                                        |
| lys470 | chr17 | 46341547 | 46342017 |              |         |           |                                                                                        |
| lys471 | chr17 | 46342320 | 46342598 |              |         |           |                                                                                        |
| lys472 | chr17 | 46692696 | 46693035 | NM_016001    | 0       | UTP18     | UTP18, small subunit (SSU) processome component, homolog (yeast)                       |
| lys473 | chr17 | 50718203 | 50718811 | NM_002126    | 20885   | HLF       | hepatic leukemia factor                                                                |
| lys474 | chr17 | 50719218 | 50720050 | NM_002126    | 21900   | HLF       | hepatic leukemia factor                                                                |
| lys475 | chr17 | 53682052 | 53682382 | NM_001160102 | 11268   | LPO       | lactoperoxidase                                                                        |
| lys476 | chr17 | 54798978 | 54799295 | NM_001005404 | 35145   | YPEL2     | yippee-like 2 (Drosophila)                                                             |
| lys477 | chr17 | 55285309 | 55285836 | NM_016261    | -39242  | TUBD1     | tubulin, delta 1                                                                       |
| lys478 | chr17 | 56893058 | 56893297 | NM_018488    | 4471    | TBX4      | T-box 4                                                                                |
| lys479 | chr17 | 58948565 | 58948865 | NM_030779    | -5561   | CKNH6     | potassium voltage-gated channel, subfamily H (eag-related), member 6                   |
| lys480 | chr17 | 59812075 | 59812374 | NM_000442    | -5369   | PECAM1    | platelet/endothelial cell adhesion molecule                                            |
| lys481 | chr17 | 60468159 | 60468454 | NM_006572    | -14928  | GNA13     | guanine nucleotide binding protein (G protein), alpha 13                               |
| lys482 | chr17 | 60988571 | 60988955 | NM_004655    | 370     | AXIN2     | axin 2                                                                                 |
| lys483 | chr17 | 61011738 | 61012070 |              |         |           |                                                                                        |
| lys484 | chr17 | 63891023 | 63892111 | NM_014960    | 124107  | ARSG      | arylsulfatase G                                                                        |
| lys485 | chr17 | 63894009 | 63894519 | NM_014960    | 127093  | ARSG      | arylsulfatase G                                                                        |
| lys486 | chr17 | 64267136 | 64267562 |              |         |           |                                                                                        |
| lys487 | chr17 | 64301716 | 64301996 |              |         |           |                                                                                        |
| lys488 | chr17 | 64328386 | 64329015 |              |         |           |                                                                                        |
| lys489 | chr17 | 64329630 | 64330023 |              |         |           |                                                                                        |
| lys490 | chr17 | 67907023 | 67907830 |              |         |           |                                                                                        |
| lys491 | chr17 | 67920862 | 67921709 |              |         |           |                                                                                        |
| lys492 | chr17 | 68026535 | 68026903 |              |         |           |                                                                                        |
| lys493 | chr17 | 68139963 | 68140396 | NM_001159770 | -460052 | SLC39A11  | solute carrier family 39 (metal ion transporter), member 11                            |
| lys494 | chr17 | 68169077 | 68169518 | NM_001159770 | -430930 | SLC39A11  | solute carrier family 39 (metal ion transporter), member 11                            |
| lys495 | chr17 | 68476557 | 68476836 | NM_001159770 | -123612 | SLC39A11  | solute carrier family 39 (metal ion transporter), member 11                            |
| lys496 | chr17 | 69938510 | 69938739 | NM_022036    | -522    | GPRC5C    | G protein-coupled receptor, family C, group 5, member C                                |
| lys497 | chr17 | 69950318 | 69950938 | NM_018653    | 8889    | GPRC5C    | G protein-coupled receptor, family C, group 5, member C                                |
| lys498 | chr17 | 71118099 | 71118435 | NR_003587    | 22367   | MYO15B    | myosin XVB pseudogene                                                                  |
| lys499 | chr17 | 71245903 | 71246166 | NM_001005619 | 13534   | ITGB4     | integrin, beta 4                                                                       |
| lys500 | chr17 | 71262171 | 71262586 | NM_000154    | -10289  | GALK1     | galactokinase 1                                                                        |
| lys501 | chr17 | 72178750 | 72179204 | NM_001008528 | -39447  | MXRA7     | matrix-remodelling associated 7                                                        |
| lys502 | chr17 | 72606695 | 72606896 | NR_003013    | 9713    | SCARNA16  | small Cajal body-specific RNA 16                                                       |
| lys503 | chr17 | 72884948 | 72885415 | NM_001113494 | 1190    | SEPT9     | septin 9                                                                               |
| lys504 | chr17 | 72900045 | 72900739 | NM_001113494 | 16287   | SEPT9     | septin 9                                                                               |
| lys505 | chr17 | 73653742 | 73654075 | NM_007267    | 13660   | TMC6      | transmembrane channel-like 6                                                           |
| lys506 | chr17 | 75348565 | 75349127 | NM_032647    | -17460  | CBX2      | chromobox homolog 2 (Pc class homolog, Drosophila)                                     |
| lys507 | chr17 | 75578553 | 75578942 | NM_019020    | -45300  | TBC1D16   | TBC1 domain family, member 16                                                          |
| lys508 | chr17 | 75581769 | 75582416 | NM_019020    | -41826  | TBC1D16   | TBC1 domain family, member 16                                                          |
| lys509 | chr17 | 76671592 | 76672059 | NM_017450    | 48052   | BAIAP2    | BAI1-associated protein 2                                                              |
| lys510 | chr17 | 76686341 | 76686699 | NM_017450    | 62801   | BAIAP2    | BAI1-associated protein 2                                                              |
| lys511 | chr17 | 77289254 | 77289734 | NM_012140    | -41     | SLC25A10  | solute carrier family 25 (mitochondrial carrier; dicarboxylate transporter), member 10 |
| lys512 | chr17 | 77461499 | 77462078 | NM_002861    | -508    | PCYT2     | phosphate cytidyltransferase 2, ethanolamine                                           |
| lys513 | chr17 | 77518856 | 77519484 | NM_178493    | 6510    | NOTUM     | notum pectinacetyltransferase homolog (Drosophila)                                     |
| lys514 | chr17 | 77542806 | 77544380 | NM_024083    | 14093   | ASPSCR1   | alveolar soft part sarcoma chromosome region, candidate 1                              |
| lys515 | chr17 | 77545189 | 77545779 | NM_024083    | 16476   | ASPSCR1   | alveolar soft part sarcoma chromosome region, candidate 1                              |
| lys516 | chr17 | 77551344 | 77551780 | NM_144998    | -22282  | STRA13    | stimulated by retinoic acid 13 homolog (mouse)                                         |
| lys517 | chr17 | 77551813 | 77552414 | NM_144998    | -21648  | STRA13    | stimulated by retinoic acid 13 homolog (mouse)                                         |
| lys518 | chr17 | 77654019 | 77654407 | NM_004104    | 4625    | FASN      | fatty acid synthase                                                                    |
| lys519 | chr17 | 77654792 | 77655606 | NM_004104    | 5398    | FASN      | fatty acid synthase                                                                    |
| lys520 | chr17 | 77839226 | 77839556 | NM_001893    | 14365   | CSNK1D    | casein kinase 1, delta                                                                 |
| lys521 | chr17 | 77879672 | 77880037 | NM_003004    | -5173   | SECTM1    | secreted and transmembrane 1                                                           |
| lys522 | chr17 | 78289351 | 78289663 | NM_022158    | 2612    | FN3K      | fructosamine 3 kinase                                                                  |
| lys523 | chr18 | 693205   | 693529   | NM_202758    | -8988   | ENOSF1    | enolase superfamily member 1                                                           |
| lys524 | chr18 | 838326   | 838647   |              |         |           |                                                                                        |
| lys525 | chr18 | 9978713  | 9978988  |              |         |           |                                                                                        |
| lys526 | chr18 | 11998293 | 11998847 | NM_014214    | 26840   | IMPA2     | inositol(myo)-1(or 4)-monophosphatase 2                                                |
| lys527 | chr18 | 13303164 | 13303370 | NM_181481    | 94380   | C18orf1   | chromosome 18 open reading frame 1                                                     |
| lys528 | chr18 | 27346140 | 27346518 | NM_001943    | 14117   | DSG2      | desmoglein 2                                                                           |
| lys529 | chr18 | 27853384 | 27853645 | NM_017831    | 943     | RNF125    | ring finger protein 125                                                                |
| lys530 | chr18 | 44561845 | 44562198 | NM_001142397 | 242422  | KIAA0427  | KIAA0427                                                                               |
| lys531 | chr18 | 44673928 | 44674314 |              |         |           |                                                                                        |
| lys532 | chr18 | 53062016 | 53062390 |              |         |           |                                                                                        |
| lys533 | chr18 | 53240540 | 53240920 | NM_004852    | -12994  | ONECUT2   | one cut homeobox 2                                                                     |
| lys534 | chr18 | 53590669 | 53591012 |              |         |           |                                                                                        |
| lys535 | chr18 | 53615404 | 53615751 |              |         |           |                                                                                        |
| lys536 | chr18 | 54231821 | 54232745 | NM_001144966 | 192076  | NEDD4L    | neural precursor cell expressed, developmentally down-regulated 4-like                 |
| lys537 | chr18 | 58270536 | 58271067 |              |         |           |                                                                                        |
| lys538 | chr18 | 58344530 | 58345236 | NM_017742    | 2894    | ZCCHC2    | zinc finger, CCHC domain containing 2                                                  |
| lys539 | chr18 | 70067480 | 70067784 | NM_148923    | -42417  | CYB5A     | cytochrome b5 type A (microsomal)                                                      |
| lys540 | chr18 | 70110128 | 70110842 | NM_148923    | 0       | CYB5A     | cytochrome b5 type A (microsomal)                                                      |
| lys541 | chr18 | 70510405 | 70510747 | NM_017757    | 38500   | ZNF407    | zinc finger protein 407                                                                |
| lys542 | chr18 | 75808876 | 75809205 | NM_001146343 | -3436   | PQLC1     | PQ loop repeat containing 1                                                            |
| lys543 | chr19 | 689544   | 689954   | NM_173481    | -12191  | C19orf21  | chromosome 19 open reading frame 21                                                    |
| lys544 | chr19 | 885895   | 886199   | NM_005224    | 8860    | ARID3A    | AT rich interactive domain 3A (BRIGHT-like)                                            |
| lys545 | chr19 | 903578   | 904024   | NM_005224    | 26543   | ARID3A    | AT rich interactive domain 3A (BRIGHT-like)                                            |
| lys546 | chr19 | 997232   | 997674   | NM_019112    | 6132    | ABCA7     | ATP-binding cassette, sub-family A (ABC1), member 7                                    |
| lys547 | chr19 | 1049337  | 1049699  | NM_002695    | 2947    | POLR2E    | polymerase (RNA) II (DNA directed) polypeptide E, 25kDa                                |

|        |       |          |          |              |         |              |                                                                                   |
|--------|-------|----------|----------|--------------|---------|--------------|-----------------------------------------------------------------------------------|
| lys548 | chr19 | 1324267  | 1325053  | NM_024407    | -9829   | NDUFS7       | NADH dehydrogenase (ubiquinone) Fe-S protein 7, 20kDa (NADH-coenzyme Q reductase) |
| lys549 | chr19 | 1375353  | 1375829  | NM_001018    | -13533  | RPS15        | ribosomal protein S15                                                             |
| lys550 | chr19 | 3013659  | 3013881  | NM_198969    | -83     | AES          | amino-terminal enhancer of split                                                  |
| lys551 | chr19 | 3017552  | 3017791  | NM_198969    | 3589    | AES          | amino-terminal enhancer of split                                                  |
| lys552 | chr19 | 3348315  | 3348905  | NM_005597    | 30744   | NFIC         | nuclear factor I/C (CCAAT-binding transcription factor)                           |
| lys553 | chr19 | 3364879  | 3365291  | NM_005597    | 47308   | NFIC         | nuclear factor I/C (CCAAT-binding transcription factor)                           |
| lys554 | chr19 | 4341795  | 4342392  | NM_003025    | -9079   | SH3GL1       | SH3-domain GRB2-like 1                                                            |
| lys555 | chr19 | 4482633  | 4482889  | NM_001013706 | -3319   | LSDP5        | perilipin 5                                                                       |
| lys556 | chr19 | 4793627  | 4793793  | NM_182919    | 10891   | TICAM1       | toll-like receptor adaptor molecule 1                                             |
| lys557 | chr19 | 5831305  | 5832079  | NM_002034    | 9755    | FUT5         | fucosyltransferase 5 (alpha (1,3) fucosyltransferase)                             |
| lys558 | chr19 | 6460374  | 6460708  | NM_006087    | 7045    | TUBB4        | tubulin, beta 4                                                                   |
| lys559 | chr19 | 7165158  | 7165724  | NM_000208    | -79287  | INSR         | insulin receptor                                                                  |
| lys560 | chr19 | 8228953  | 8229326  | NM_024552    | 48738   | LASS4        | LAG1 homolog, ceramide synthase 4                                                 |
| lys561 | chr19 | 10062611 | 10063020 | NM_018381    | 4807    | C19orf66     | chromosome 19 open reading frame 66                                               |
| lys562 | chr19 | 10625595 | 10626091 | NM_012218    | 0       | ILF3         | interleukin enhancer binding factor 3, 90kDa                                      |
| lys563 | chr19 | 11210821 | 11211393 | NM_018687    | 1006    | LOC55908     | -                                                                                 |
| lys564 | chr19 | 11237490 | 11237931 | NM_020812    | 3334    | DOCK6        | dedicator of cytokinesis 6                                                        |
| lys565 | chr19 | 12303004 | 12303330 | NM_145276    | -2204   | ZNF563       | zinc finger protein 563                                                           |
| lys566 | chr19 | 12694425 | 12694717 | NM_001136196 | 0       | TNPO2        | transportin 2                                                                     |
| lys567 | chr19 | 13023395 | 13023752 | NM_002501    | 55813   | NFIX         | nuclear factor I/X (CCAAT-binding transcription factor)                           |
| lys568 | chr19 | 16418826 | 16419141 | NM_021235    | -24621  | EPS15L1      | epidermal growth factor receptor pathway substrate 15-like 1                      |
| lys569 | chr19 | 16464816 | 16465056 | NM_145046    | -2947   | CALR3        | calreticulin 3                                                                    |
| lys570 | chr19 | 18107838 | 18108252 | NM_005027    | -16763  | PIK3R2       | phosphoinositide-3-kinase, regulatory subunit 2 (beta)                            |
| lys571 | chr19 | 18479660 | 18479997 | NM_006532    | -13940  | ELL          | elongation factor RNA polymerase II                                               |
| lys572 | chr19 | 18811286 | 18811725 | NM_002911    | 7544    | UPF1         | UPF1 regulator of nonsense transcripts homolog (yeast)                            |
| lys573 | chr19 | 19068813 | 19069313 | NM_178526    | 33007   | SLC25A42     | solute carrier family 25, member 42                                               |
| lys574 | chr19 | 38457101 | 38457500 |              |         |              |                                                                                   |
| lys575 | chr19 | 38458758 | 38459297 |              |         |              |                                                                                   |
| lys576 | chr19 | 38473803 | 38474223 | NM_004364    | -11047  | CEBPA        | CCAAT/enhancer binding protein (C/EBP), alpha                                     |
| lys577 | chr19 | 38575016 | 38575650 | NM_001806    | 18569   | CEBPG        | CCAAT/enhancer binding protein (C/EBP), gamma                                     |
| lys578 | chr19 | 38582831 | 38583133 | NM_001806    | 26384   | CEBPG        | CCAAT/enhancer binding protein (C/EBP), gamma                                     |
| lys579 | chr19 | 38586142 | 38586730 | NM_000285    | -117911 | PEPD         | peptidase D                                                                       |
| lys580 | chr19 | 39488951 | 39489340 | NM_014686    | 51657   | KIAA0355     | KIAA0355                                                                          |
| lys581 | chr19 | 39686451 | 39686788 | NM_001080436 | 21733   | WTIP         | Wilms tumor 1 interacting protein                                                 |
| lys582 | chr19 | 42838782 | 42839026 | NM_014898    | 630     | ZFP30        | zinc finger protein 30 homolog (mouse)                                            |
| lys583 | chr19 | 43883792 | 43884253 | NM_004924    | 53627   | ACTN4        | actinin, alpha 4                                                                  |
| lys584 | chr19 | 43942041 | 43942363 | NM_002307    | -13634  | LGALS7       | lectin, galactoside-binding, soluble, 7                                           |
| lys585 | chr19 | 45429326 | 45429647 | NM_001144029 | 4890    | CNTD2        | cyclin N-terminal domain containing 2                                             |
| lys586 | chr19 | 46029587 | 46029846 | NM_000762    | -18346  | CYP2A6       | cytochrome P450, family 2, subfamily A, polypeptide 6                             |
| lys587 | chr19 | 46423800 | 46424174 | NM_021913    | 6854    | AXL          | AXL receptor tyrosine kinase                                                      |
| lys588 | chr19 | 47467049 | 47467310 | NM_015125    | -13346  | CIC          | capicua homolog (Drosophila)                                                      |
| lys589 | chr19 | 49960263 | 49960476 | NM_001130852 | -12489  | CBLC         | Cas-Br-M (murine) ecotropic retroviral transforming sequence c                    |
| lys590 | chr19 | 50002245 | 50002559 | NM_005581    | -1618   | BCAM         | basal cell adhesion molecule (Lutheran blood group)                               |
| lys591 | chr19 | 50119356 | 50119711 | NM_001645    | 9597    | APOC1        | apolipoprotein C-I                                                                |
| lys592 | chr19 | 50120622 | 50120811 | NM_001645    | 10863   | APOC1        | apolipoprotein C-I                                                                |
| lys593 | chr19 | 50650819 | 50651188 | NM_001114171 | -11904  | FOSB         | FBJ murine osteosarcoma viral oncogene homolog B                                  |
| lys594 | chr19 | 53466844 | 53467177 | NM_153608    | 380     | ZNF114       | zinc finger protein 114                                                           |
| lys595 | chr19 | 53829441 | 53829876 | NM_001352    | -2575   | DBP          | D site of albumin promoter (albumin D-box) binding protein                        |
| lys596 | chr19 | 56551284 | 56551533 | NM_001014763 | 1377    | ETFB         | electron-transfer-flavoprotein, beta polypeptide                                  |
| lys597 | chr19 | 56557746 | 56558420 | NM_001985    | -3064   | ETFB         | electron-transfer-flavoprotein, beta polypeptide                                  |
| lys598 | chr19 | 61314371 | 61314617 | NM_001002836 | -9844   | ZNF787       | zinc finger protein 787                                                           |
| lys599 | chr2  | 3611042  | 3611617  | NM_024027    | -8894   | COLEC11      | collectin sub-family member 11                                                    |
| lys600 | chr2  | 3630917  | 3631287  | NM_024027    | 10407   | COLEC11      | collectin sub-family member 11                                                    |
| lys601 | chr2  | 8667068  | 8667382  |              |         |              |                                                                                   |
| lys602 | chr2  | 8685306  | 8685631  |              |         |              |                                                                                   |
| lys603 | chr2  | 10100840 | 10101140 | NM_003597    | 0       | KLF11        | Kruppel-like factor 11                                                            |
| lys604 | chr2  | 10421633 | 10421822 | NM_134421    | 60358   | HPCAL1       | hippocalcin-like 1                                                                |
| lys605 | chr2  | 10505487 | 10505722 | NM_002539    | -182    | ODC1         | ornithine decarboxylase 1                                                         |
| lys606 | chr2  | 11411971 | 11412427 | NM_004850    | 9810    | ROCK2        | Rho-associated, coiled-coil containing protein kinase 2                           |
| lys607 | chr2  | 18845074 | 18845869 |              |         |              |                                                                                   |
| lys608 | chr2  | 20135191 | 20135591 | NM_014713    | 19922   | LAPTM4A      | lysosomal protein transmembrane 4 alpha                                           |
| lys609 | chr2  | 20256012 | 20256288 | NM_002997    | -32120  | SDC1         | syndecan 1                                                                        |
| lys610 | chr2  | 20644029 | 20644387 |              |         |              |                                                                                   |
| lys611 | chr2  | 20656127 | 20657158 |              |         |              |                                                                                   |
| lys612 | chr2  | 20791384 | 20791677 | NM_021925    | -94631  | C2orf43      | chromosome 2 open reading frame 43                                                |
| lys613 | chr2  | 21118480 | 21118938 | NM_000384    | -1512   | APOB         | apolipoprotein B (including Ag(x) antigen)                                        |
| lys614 | chr2  | 21119339 | 21119867 | NM_000384    | -583    | APOB         | apolipoprotein B (including Ag(x) antigen)                                        |
| lys615 | chr2  | 21123542 | 21123891 | NM_000384    | 3093    | APOB         | apolipoprotein B (including Ag(x) antigen)                                        |
| lys616 | chr2  | 21132649 | 21133100 | NM_000384    | 12200   | APOB         | apolipoprotein B (including Ag(x) antigen)                                        |
| lys617 | chr2  | 26088604 | 26088843 |              |         |              |                                                                                   |
| lys618 | chr2  | 27286082 | 27286348 | NM_016085    | -2054   | C2orf28      | chromosome 2 open reading frame 28                                                |
| lys619 | chr2  | 27572729 | 27573356 | NM_001486    | 0       | GCKR         | glycokinase (hexokinase 4) regulator                                              |
| lys620 | chr2  | 36582728 | 36583114 | NM_016441    | 145829  | CRIM1        | cysteine rich transmembrane BMP regulator 1 (chordin-like)                        |
| lys621 | chr2  | 43007161 | 43007457 |              |         |              |                                                                                   |
| lys622 | chr2  | 43291012 | 43291610 | NM_006887    | -15639  | ZFP36L2      | zinc finger protein 36, C3H type-like 2                                           |
| lys623 | chr2  | 43307725 | 43308113 | NR_027251    | 0       | LOC100129726 | -                                                                                 |
| lys624 | chr2  | 46406969 | 46407237 | NM_001430    | 28904   | EPAS1        | endothelial PAS domain protein 1                                                  |
| lys625 | chr2  | 46429621 | 46430050 | NM_001430    | 51556   | EPAS1        | endothelial PAS domain protein 1                                                  |
| lys626 | chr2  | 47390442 | 47391225 |              |         |              |                                                                                   |
| lys627 | chr2  | 54655178 | 54655436 | NM_178313    | 16145   | SPTBN1       | spectrin, beta, non-erythrocytic 1                                                |
| lys628 | chr2  | 54710592 | 54710871 | NM_178313    | 71559   | SPTBN1       | spectrin, beta, non-erythrocytic 1                                                |
| lys629 | chr2  | 61617265 | 61617540 | NM_003400    | -1382   | XPO1         | exportin 1 (CRM1 homolog, yeast)                                                  |
| lys630 | chr2  | 62275134 | 62275614 | NM_006577    | -1151   | B3GNT2       | UDP-GlcNAc:betaGal beta-1,3-N-acetylglucosaminyltransferase 2                     |
| lys631 | chr2  | 62275948 | 62276464 | NM_006577    | -301    | B3GNT2       | UDP-GlcNAc:betaGal beta-1,3-N-acetylglucosaminyltransferase 2                     |
| lys632 | chr2  | 62531294 | 62531621 |              |         |              |                                                                                   |
| lys633 | chr2  | 63900971 | 63901466 |              |         |              |                                                                                   |
| lys634 | chr2  | 64734849 | 64735154 | NM_014755    | 300     | SERTAD2      | SERTA domain containing 2                                                         |
| lys635 | chr2  | 64811199 | 64811632 |              |         |              |                                                                                   |
| lys636 | chr2  | 69360572 | 69361024 |              |         |              |                                                                                   |
| lys637 | chr2  | 69862066 | 69862408 | NM_001153    | 39437   | ANXA4        | annexin A4                                                                        |
| lys638 | chr2  | 70170275 | 70170481 | NM_006196    | 2188    | PCBP1        | poly(rC) binding protein 1                                                        |

|        |       |           |           |              |         |            |                                                                  |
|--------|-------|-----------|-----------|--------------|---------|------------|------------------------------------------------------------------|
| lys639 | chr2  | 70350277  | 70350592  | NM_016297    | 11544   | PCYOX1     | prenylcysteine oxidase 1                                         |
| lys640 | chr2  | 71963574  | 71964002  |              |         |            |                                                                  |
| lys641 | chr2  | 73081631  | 73082118  | NM_144579    | -70355  | SFXN5      | sideroflexin 5                                                   |
| lys642 | chr2  | 74228340  | 74228684  | NM_212552    | 0       | BOLA3      | bolA homolog 3 (E. coli)                                         |
| lys643 | chr2  | 74998379  | 74998650  |              |         |            |                                                                  |
| lys644 | chr2  | 84374517  | 84374868  | NR_003663    | 3202    | LOC388965  | -                                                                |
| lys645 | chr2  | 85387677  | 85387955  | NM_006464    | -20930  | TGOLN2     | trans-golgi network protein 2                                    |
| lys646 | chr2  | 85501994  | 85502306  | NM_001747    | 10808   | CAPG       | capping protein (actin filament), gelsolin-like                  |
| lys647 | chr2  | 85665047  | 85665395  | NM_006634    | 7       | VAMP5      | vesicle-associated membrane protein 5 (myobrevin)                |
| lys648 | chr2  | 95419984  | 95420416  | NM_016044    | -11758  | FAHD2A     | fumarylacetoacetate hydrolase domain containing 2A               |
| lys649 | chr2  | 99472787  | 99473446  | NM_016316    | 0       | REV1       | REV1 homolog (S. cerevisiae)                                     |
| lys650 | chr2  | 101089472 | 101089813 | NM_001102426 | -44465  | TBC1D8     | TBC1 domain family, member 8 (with GRAM domain)                  |
| lys651 | chr2  | 101716104 | 101716485 | NM_145686    | 35186   | MAP4K4     | mitogen-activated protein kinase kinase kinase kinase 4          |
| lys652 | chr2  | 101734772 | 101735038 | NM_145686    | 53854   | MAP4K4     | mitogen-activated protein kinase kinase kinase kinase 4          |
| lys653 | chr2  | 105784177 | 105784513 | NM_003581    | 56393   | NCK2       | NCK adaptor protein 2                                            |
| lys654 | chr2  | 113119285 | 113119591 | NM_005415    | -406    | SLC20A1    | solute carrier family 20 (phosphate transporter), member 1       |
| lys655 | chr2  | 113601003 | 113601680 | NM_173842    | 0       | IL1RN      | interleukin 1 receptor antagonist                                |
| lys656 | chr2  | 114451715 | 114452633 | NM_005721    | 87710   | ACTR3      | ARP3 actin-related protein 3 homolog (yeast)                     |
| lys657 | chr2  | 119899866 | 119900438 | NM_183240    | -5477   | TMEM37     | transmembrane protein 37                                         |
| lys658 | chr2  | 119900874 | 119901316 | NM_183240    | -4599   | TMEM37     | transmembrane protein 37                                         |
| lys659 | chr2  | 120940014 | 120940737 | NR_027181    | 0       | LOC84931   | -                                                                |
| lys660 | chr2  | 120944297 | 120944712 | NR_027181    | 3903    | LOC84931   | -                                                                |
| lys661 | chr2  | 121002310 | 121002694 |              |         |            |                                                                  |
| lys662 | chr2  | 127470815 | 127471091 |              |         |            |                                                                  |
| lys663 | chr2  | 127471327 | 127471489 |              |         |            |                                                                  |
| lys664 | chr2  | 127912171 | 127912686 | NM_000312    | 19686   | PROC       | protein C (inactivator of coagulation factors Va and VIIIa)      |
| lys665 | chr2  | 127929021 | 127929546 |              |         |            |                                                                  |
| lys666 | chr2  | 128783409 | 128784052 | NM_004807    | -8589   | HS6ST1     | heparan sulfate 6-O-sulfotransferase 1                           |
| lys667 | chr2  | 129069181 | 129069473 |              |         |            |                                                                  |
| lys668 | chr2  | 130811504 | 130811820 | NM_032357    | -4572   | CCDC115    | coiled-coil domain containing 115                                |
| lys669 | chr2  | 132728390 | 132728501 | NR_027020    | -3511   | NCRNA00164 | non-protein coding RNA 164                                       |
| lys670 | chr2  | 132729291 | 132729373 | NR_027020    | -2639   | NCRNA00164 | non-protein coding RNA 164                                       |
| lys671 | chr2  | 132731657 | 132731840 | NR_027020    | -172    | NCRNA00164 | non-protein coding RNA 164                                       |
| lys672 | chr2  | 132754589 | 132754694 |              |         |            |                                                                  |
| lys673 | chr2  | 152417510 | 152418056 | NM_001005747 | -120675 | CACNB4     | calcium channel, voltage-dependent, beta 4 subunit               |
| lys674 | chr2  | 152974800 | 152975166 | NM_052905    | 74805   | FMNL2      | formin-like 2                                                    |
| lys675 | chr2  | 153050838 | 153051201 | NM_052905    | 150843  | FMNL2      | formin-like 2                                                    |
| lys676 | chr2  | 158405430 | 158405842 | NM_001105    | -34027  | ACVR1      | activin A receptor, type I                                       |
| lys677 | chr2  | 161680365 | 161680895 |              |         |            |                                                                  |
| lys678 | chr2  | 161725662 | 161725968 | NM_004180    | 23952   | TANK       | TRAF family member-associated NFKB activator                     |
| lys679 | chr2  | 162592478 | 162592755 | NM_001935    | -46543  | DPP4       | dipeptidyl-peptidase 4                                           |
| lys680 | chr2  | 168392234 | 168392868 | NM_020981    | 8808    | B3GALT1    | UDP-Gal:betaGlcNAc beta 1,3-galactosyltransferase, polypeptide 1 |
| lys681 | chr2  | 171276572 | 171277308 | NR_027433    | -2015   | LOC440925  | -                                                                |
| lys682 | chr2  | 189623466 | 189623684 | NM_000393    | -129166 | COL5A2     | collagen, type V, alpha 2                                        |
| lys683 | chr2  | 191382083 | 191382746 |              |         |            |                                                                  |
| lys684 | chr2  | 191950276 | 191950592 | NM_001161819 | 131779  | MYO1B      | myosin IB                                                        |
| lys685 | chr2  | 192210713 | 192211085 |              |         |            |                                                                  |
| lys686 | chr2  | 198186493 | 198186925 | NM_144629    | -61904  | RFTN2      | raftlin family member 2                                          |
| lys687 | chr2  | 201630609 | 201631151 | NM_173822    | -13486  | FAM126B    | family with sequence similarity 126, member B                    |
| lys688 | chr2  | 208420064 | 208420662 | NM_001080475 | -177867 | PLEKHM3    | pleckstrin homology domain containing, family M, member 3        |
| lys689 | chr2  | 211121968 | 211122366 | NM_001875    | -7204   | CPS1       | carbamoyl-phosphate synthase 1, mitochondrial                    |
| lys690 | chr2  | 215993486 | 215993757 | NM_054034    | -15279  | FN1        | fibronectin 1                                                    |
| lys691 | chr2  | 216322233 | 216322638 |              |         |            |                                                                  |
| lys692 | chr2  | 216860262 | 216860578 | NM_020814    | -84417  | MARCH4     | membrane-associated ring finger (C3HC4) 4                        |
| lys693 | chr2  | 219304527 | 219304921 | NM_014640    | 20717   | TLL4       | tubulin tyrosine ligase-like family, member 4                    |
| lys694 | chr2  | 219306637 | 219306941 | NM_014640    | 22827   | TLL4       | tubulin tyrosine ligase-like family, member 4                    |
| lys695 | chr2  | 219684640 | 219684951 | NM_024782    | -48880  | NHEJ1      | nonhomologous end-joining factor 1                               |
| lys696 | chr2  | 220118860 | 220119256 | NM_001005209 | 1873    | TMEM198    | transmembrane protein 198                                        |
| lys697 | chr2  | 224718845 | 224719143 |              |         |            |                                                                  |
| lys698 | chr2  | 228386597 | 228387129 | NM_001130046 | 0       | CCL20      | chemokine (C-C motif) ligand 20                                  |
| lys699 | chr2  | 229753731 | 229753865 | NM_017933    | -90436  | PID1       | phosphotyrosine interaction domain containing 1                  |
| lys700 | chr2  | 231951274 | 231951576 | NM_145236    | -17002  | B3GNT7     | UDP-GlcNAc:betaGal beta-1,3-N-acetylglucosaminyltransferase 7    |
| lys701 | chr2  | 233123485 | 233124093 | NM_004846    | 0       | EIF4E2     | eukaryotic translation initiation factor 4E family member 2      |
| lys702 | chr2  | 233636170 | 233636803 | NM_001017915 | 2892    | INPP5D     | inositol polyphosphate-5-phosphatase, 145kDa                     |
| lys703 | chr2  | 233961345 | 233961559 | NM_003648    | 0       | DGKD       | diacylglycerol kinase, delta 130kDa                              |
| lys704 | chr2  | 234862422 | 234862718 |              |         |            |                                                                  |
| lys705 | chr2  | 235262398 | 235262891 |              |         |            |                                                                  |
| lys706 | chr2  | 235419250 | 235419693 |              |         |            |                                                                  |
| lys707 | chr2  | 235571735 | 235572033 | NM_014521    | 46370   | SH3BP4     | SH3-domain binding protein 4                                     |
| lys708 | chr2  | 238307153 | 238307541 | NM_001137552 | 41609   | LRRFIP1    | leucine rich repeat (in FLII) interacting protein 1              |
| lys709 | chr2  | 241382386 | 241382685 | NM_004321    | -25612  | KIF1A      | kinesin family member 1A                                         |
| lys710 | chr2  | 242020849 | 242021347 | NM_014808    | 76467   | FARP2      | FERM, RhoGEF and pleckstrin domain protein 2                     |
| lys711 | chr2  | 242241491 | 242241793 | NM_178326    | 15793   | ATG4B      | ATG4 autophagy related 4 homolog B (S. cerevisiae)               |
| lys712 | chr2  | 242408907 | 242409263 | NM_080741    | 8163    | NEU4       | sialidase 4                                                      |
| lys713 | chr20 | 318986    | 319304    | NM_021158    | 9680    | TRIB3      | tribbles homolog 3 (Drosophila)                                  |
| lys714 | chr20 | 1256794   | 1257101   | NM_080489    | -737    | SDCBP2     | syndecan binding protein (syntenin) 2                            |
| lys715 | chr20 | 2404673   | 2404970   | NM_003091    | 5175    | SNRNP      | small nuclear ribonucleoprotein polypeptides B and B1            |
| lys716 | chr20 | 4890480   | 4890765   | NM_005116    | -39380  | SLC23A2    | solute carrier family 23 (nucleobase transporters), member 2     |
| lys717 | chr20 | 10440115  | 10440494  | NM_001009608 | 76166   | C20orf94   | chromosome 20 open reading frame 94                              |
| lys718 | chr20 | 10533143  | 10533561  | NM_001009608 | 169194  | C20orf94   | chromosome 20 open reading frame 94                              |
| lys719 | chr20 | 17609013  | 17609351  | NM_001042576 | -1577   | RRBP1      | ribosome binding protein 1 homolog 180kDa (dog)                  |
| lys720 | chr20 | 18066350  | 18066850  | NM_020536    | 0       | CSR2BP     | CSR2 binding protein                                             |
| lys721 | chr20 | 19893182  | 19893557  | NM_018993    | 74974   | RIN2       | Ras and Rab interactor 2                                         |
| lys722 | chr20 | 22359390  | 22359718  | NR_027090    | 10110   | LOC284788  | -                                                                |
| lys723 | chr20 | 22462695  | 22463008  |              |         |            |                                                                  |
| lys724 | chr20 | 23515523  | 23515684  | NM_080610    | 18138   | CST9L      | cystatin 9-like                                                  |
| lys725 | chr20 | 23557597  | 23558066  | NM_000099    | -8508   | CST3       | cystatin C                                                       |
| lys726 | chr20 | 23589068  | 23589406  |              |         |            |                                                                  |
| lys727 | chr20 | 25467739  | 25467917  | NM_025176    | -46236  | NINL       | ninein-like                                                      |
| lys728 | chr20 | 26136666  | 26136790  |              |         |            |                                                                  |
| lys729 | chr20 | 26136832  | 26136933  |              |         |            |                                                                  |
| lys730 | chr20 | 26137009  | 26137105  |              |         |            |                                                                  |



|        |       |          |          |              |         |            |  |                                                                                 |  |
|--------|-------|----------|----------|--------------|---------|------------|--|---------------------------------------------------------------------------------|--|
| lys731 | chr20 | 26137291 | 26137382 |              |         |            |  |                                                                                 |  |
| lys732 | chr20 | 26137787 | 26138297 |              |         |            |  |                                                                                 |  |
| lys733 | chr20 | 29715391 | 29716209 | NM_032609    | 26041   | COX4I2     |  | cytochrome c oxidase subunit IV isoform 2 (lung)                                |  |
| lys734 | chr20 | 29756037 | 29756386 | NM_001191    | -17931  | BCL2L1     |  | BCL2-like 1                                                                     |  |
| lys735 | chr20 | 30233497 | 30234149 | NR_002781    | -7675   | TSPYL3     |  | TSPY-like 3 (pseudogene)                                                        |  |
| lys736 | chr20 | 30591469 | 30591791 |              |         |            |  |                                                                                 |  |
| lys737 | chr20 | 30595262 | 30595673 |              |         |            |  |                                                                                 |  |
| lys738 | chr20 | 31762764 | 31762950 | NM_007238    | -8847   | PXMP4      |  | peroxisomal membrane protein 4, 24kDa                                           |  |
| lys739 | chr20 | 34234107 | 34234433 | NM_012156    | 28033   | EPB41L1    |  | erythrocyte membrane protein band 4.1-like 1                                    |  |
| lys740 | chr20 | 35345650 | 35346063 | NM_001003897 | -5401   | MANBAL     |  | mannosidase, beta A, lysosomal-like                                             |  |
| lys741 | chr20 | 35347385 | 35347870 | NM_001003897 | -3594   | MANBAL     |  | mannosidase, beta A, lysosomal-like                                             |  |
| lys742 | chr20 | 35397792 | 35398207 | NM_005417    | -8294   | SRC        |  | v-src sarcoma (Schmidt-Ruppin A-2) viral oncogene homolog (avian)               |  |
| lys743 | chr20 | 35405425 | 35405724 | NM_005417    | -777    | SRC        |  | v-src sarcoma (Schmidt-Ruppin A-2) viral oncogene homolog (avian)               |  |
| lys744 | chr20 | 35588101 | 35588426 | NM_006698    | -1291   | BLCAP      |  | bladder cancer associated protein                                               |  |
| lys745 | chr20 | 36229920 | 36230107 | NM_004613    | 2807    | TGM2       |  | transglutaminase 2 (C polypeptide, protein-glutamine-gamma-glutamyltransferase) |  |
| lys746 | chr20 | 36729559 | 36729963 |              |         |            |  |                                                                                 |  |
| lys747 | chr20 | 39065056 | 39065584 |              |         |            |  |                                                                                 |  |
| lys748 | chr20 | 42456458 | 42457432 | NM_178850    | -5905   | HNF4A      |  | hepatocyte nuclear factor 4, alpha                                              |  |
| lys749 | chr20 | 43028051 | 43028636 | NM_006282    | 0       | STK4       |  | serine/threonine kinase 4                                                       |  |
| lys750 | chr20 | 43952999 | 43953526 | NM_080749    | 0       | NEURL2     |  | neuronalized homolog 2 (Drosophila)                                             |  |
| lys751 | chr20 | 43971329 | 43971609 | NM_182676    | -2584   | PLTP       |  | phospholipid transfer protein                                                   |  |
| lys752 | chr20 | 44008353 | 44008779 | NM_022104    | 11631   | PCIF1      |  | PDX1 C-terminal inhibiting factor 1                                             |  |
| lys753 | chr20 | 44188443 | 44188876 | NM_001250    | 8132    | CD40       |  | CD40 molecule, TNF receptor superfamily member 5                                |  |
| lys754 | chr20 | 44728916 | 44729533 | NM_022829    | 15412   | SLC13A3    |  | solute carrier family 13 (sodium-dependent dicarboxylate transporter), member 3 |  |
| lys755 | chr20 | 45295636 | 45295885 | NM_012408    | -122996 | ZMYND8     |  | zinc finger, MYND-type containing 8                                             |  |
| lys756 | chr20 | 45773295 | 45773765 | NM_018837    | -74450  | SULF2      |  | sulfatase 2                                                                     |  |
| lys757 | chr20 | 45787493 | 45787770 | NM_018837    | -60445  | SULF2      |  | sulfatase 2                                                                     |  |
| lys758 | chr20 | 47633510 | 47634280 | NM_000961    | 15397   | PTGIS      |  | prostaglandin I2 (prostacyclin) synthase                                        |  |
| lys759 | chr20 | 48324732 | 48325289 |              |         |            |  |                                                                                 |  |
| lys760 | chr20 | 48355201 | 48356716 |              |         |            |  |                                                                                 |  |
| lys761 | chr20 | 48490417 | 48490701 |              |         |            |  |                                                                                 |  |
| lys762 | chr20 | 49792972 | 49793347 | NM_006045    | -24968  | ATP9A      |  | ATPase, class II, type 9A                                                       |  |
| lys763 | chr20 | 49831195 | 49831509 | NM_006045    | 12881   | ATP9A      |  | ATPase, class II, type 9A                                                       |  |
| lys764 | chr20 | 51836468 | 51836733 |              |         |            |  |                                                                                 |  |
| lys765 | chr20 | 55555696 | 55556068 | NM_002591    | -13474  | PCK1       |  | phosphoenolpyruvate carboxykinase 1 (soluble)                                   |  |
| lys766 | chr20 | 57024347 | 57025129 | NM_030773    | -2574   | TUBB1      |  | tubulin, beta 1                                                                 |  |
| lys767 | chr20 | 60361478 | 60361786 | NM_005560    | -13977  | LAMA5      |  | laminin, alpha 5                                                                |  |
| lys768 | chr20 | 60753859 | 60754159 | NM_016354    | 9619    | SLC04A1    |  | solute carrier organic anion transporter family, member 4A1                     |  |
| lys769 | chr20 | 61018643 | 61018953 | NM_080796    | -9337   | DIDO1      |  | death inducer-obliterator 1                                                     |  |
| lys770 | chr20 | 61679180 | 61679414 | NM_001037335 | 3145    | PRIC285    |  | -                                                                               |  |
| lys771 | chr20 | 61848131 | 61848566 | NM_020062    | 6478    | SLC2A4RG   |  | SLC2A4 regulator                                                                |  |
| lys772 | chr20 | 62154972 | 62155205 | NM_018419    | 3550    | SOX18      |  | SRY (sex determining region Y)-box 18                                           |  |
| lys773 | chr21 | 32625180 | 32625524 | NM_178817    | 39187   | MRAP       |  | melanocortin 2 receptor accessory protein                                       |  |
| lys774 | chr21 | 32658510 | 32658960 | NR_002996    | -12542  | SNORA80    |  | small nucleolar RNA, H/ACA box 80                                               |  |
| lys775 | chr21 | 35130247 | 35130632 | NM_001001890 | -52225  | RUNX1      |  | run1-related transcription factor 1                                             |  |
| lys776 | chr21 | 36278843 | 36279190 |              |         |            |  |                                                                                 |  |
| lys777 | chr21 | 37024858 | 37025372 | NM_009586    | 30999   | SIM2       |  | single-minded homolog 2 (Drosophila)                                            |  |
| lys778 | chr21 | 44614323 | 44614551 | NM_003307    | 16413   | TRPM2      |  | transient receptor potential cation channel, subfamily M, member 2              |  |
| lys779 | chr21 | 45671903 | 45672275 | NR_027498    | 2491    | NCRNA00175 |  | non-protein coding RNA 175                                                      |  |
| lys780 | chr21 | 45693065 | 45693661 | NM_030582    | -6190   | COL18A1    |  | collagen, type XVIII, alpha 1                                                   |  |
| lys781 | chr22 | 17911356 | 17911787 | NM_003277    | 18497   | CLDN5      |  | claudin 5                                                                       |  |
| lys782 | chr22 | 18452460 | 18452857 | NM_022720    | 4628    | DGCR8      |  | DiGeorge syndrome critical region gene 8                                        |  |
| lys783 | chr22 | 18496421 | 18496782 | NM_013373    | -2582   | ZDHHC8     |  | zinc finger, DHHC-type containing 8                                             |  |
| lys784 | chr22 | 20361980 | 20362322 | NM_148176    | 11709   | PPLI2      |  | peptidylprolyl isomerase (cyclophilin)-like 2                                   |  |
| lys785 | chr22 | 22446385 | 22446776 | NM_005940    | 1351    | MMP11      |  | matrix metalloproteinase 11 (stromelysin 3)                                     |  |
| lys786 | chr22 | 23231356 | 23231650 | NM_016327    | 10107   | UPB1       |  | ureidopropionase, beta                                                          |  |
| lys787 | chr22 | 23232450 | 23232954 | NM_016327    | 11201   | UPB1       |  | ureidopropionase, beta                                                          |  |
| lys788 | chr22 | 23240197 | 23240598 | NM_016327    | 18948   | UPB1       |  | ureidopropionase, beta                                                          |  |
| lys789 | chr22 | 23275940 | 23276861 | NM_031444    | -4414   | C22orf13   |  | chromosome 22 open reading frame 13                                             |  |
| lys790 | chr22 | 23620479 | 23620757 | NM_001098497 | 88345   | SGSM1      |  | small G protein signaling modulator 1                                           |  |
| lys791 | chr22 | 27528194 | 27528502 | NM_001079539 | 1635    | XBP1       |  | X-box binding protein 1                                                         |  |
| lys792 | chr22 | 27649803 | 27650258 | NM_032173    | 39915   | ZNRF3      |  | zinc and ring finger 3                                                          |  |
| lys793 | chr22 | 28934900 | 28935246 |              |         |            |  |                                                                                 |  |
| lys794 | chr22 | 29231129 | 29231492 | NM_001161368 | -206    | SEC14L4    |  | SEC14-like 4 (S. cerevisiae)                                                    |  |
| lys795 | chr22 | 30975303 | 30975558 | NM_014227    | -5760   | SLC5A4     |  | solute carrier family 5 (low affinity glucose cotransporter), member 4          |  |
| lys796 | chr22 | 31506371 | 31506717 | NM_133633    | -226089 | SYN3       |  | synapsin III                                                                    |  |
| lys797 | chr22 | 31996749 | 31996977 | NM_133642    | -649439 | LARGE      |  | like-glycosyltransferase                                                        |  |
| lys798 | chr22 | 35145241 | 35145739 |              |         |            |  |                                                                                 |  |
| lys799 | chr22 | 36211057 | 36211341 | NM_002405    | -990    | MFNG       |  | MFNG O-fucosylpeptide 3-beta-N-acetylglucosaminyltransferase                    |  |
| lys800 | chr22 | 36227655 | 36228171 | NM_002405    | 15325   | MFNG       |  | MFNG O-fucosylpeptide 3-beta-N-acetylglucosaminyltransferase                    |  |
| lys801 | chr22 | 36903847 | 36904271 | NM_003560    | -3436   | PLA2G6     |  | phospholipase A2, group VI (cytosolic, calcium-independent)                     |  |
| lys802 | chr22 | 37009719 | 37009956 | NM_012264    | 10758   | TMEM184B   |  | transmembrane protein 184B                                                      |  |
| lys803 | chr22 | 39949417 | 39949786 | NM_138481    | -17095  | CHADL      |  | chondroadherin-like                                                             |  |
| lys804 | chr22 | 40034540 | 40034844 | NM_017590    | 7029    | ZC3H7B     |  | zinc finger CCCH-type containing 7B                                             |  |
| lys805 | chr22 | 40140450 | 40140728 | NM_016272    | -32245  | TOB2       |  | transducer of ERBB2, 2                                                          |  |
| lys806 | chr22 | 41639803 | 41640110 | NM_007229    | -32881  | PACSLIN2   |  | protein kinase C and casein kinase substrate in neurons 2                       |  |
| lys807 | chr22 | 42104278 | 42104672 |              |         |            |  |                                                                                 |  |
| lys808 | chr22 | 44047084 | 44047357 | NM_006953    | -12195  | UPK3A      |  | uroplakin 3A                                                                    |  |
| lys809 | chr22 | 44055229 | 44055542 | NM_006953    | -4010   | UPK3A      |  | uroplakin 3A                                                                    |  |
| lys810 | chr22 | 44634814 | 44635054 | NM_013236    | 188465  | ATXN10     |  | ataxin 10                                                                       |  |
| lys811 | chr22 | 45227694 | 45228355 | NM_014246    | -83376  | CELSR1     |  | cadherin, EGF LAG seven-pass G-type receptor 1 (flamingo homolog, Drosophila)   |  |
| lys812 | chr22 | 45506117 | 45506486 | NM_022766    | -6330   | CERK       |  | ceramide kinase                                                                 |  |
| lys813 | chr22 | 45573201 | 45573580 | NM_014346    | 35990   | TBC1D22A   |  | TBC1 domain family, member 22A                                                  |  |
| lys814 | chr22 | 48732135 | 48732384 | NM_001001852 | -7762   | PIM3       |  | pim-3 oncogene                                                                  |  |
| lys815 | chr22 | 48919603 | 48919887 | NM_018995    | 48984   | MOV10L1    |  | Mov10L1, Moloney leukemia virus 10-like 1, homolog (mouse)                      |  |
| lys816 | chr22 | 49270673 | 49271004 | NM_017584    | -1074   | MIOX       |  | myo-inositol oxygenase                                                          |  |
| lys817 | chr22 | 49354035 | 49354414 | NM_001123225 | 5842    | C22orf41   |  | chromosome 22 open reading frame 41                                             |  |
| lys818 | chr22 | 49426966 | 49427607 | NM_001085426 | 13494   | ARSA       |  | arylsulfatase A                                                                 |  |
| lys819 | chr3  | 4994607  | 4996291  | NM_003670    | 0       | BHLHE40    |  | basic helix-loop-helix family, member e40                                       |  |

|        |      |           |           |              |         |              |                                                                                        |
|--------|------|-----------|-----------|--------------|---------|--------------|----------------------------------------------------------------------------------------|
| lys820 | chr3 | 5003437   | 5003934   | NM_003670    | 7342    | BHLHE40      | basic helix-loop-helix family, member e40                                              |
| lys821 | chr3 | 14694511  | 14694968  | NM_032137    | 2855    | C3orf20      | chromosome 3 open reading frame 20                                                     |
| lys822 | chr3 | 15222387  | 15222808  | NR_027927    | 0       | DVWA         | collagen, type VI, alpha 4 pseudogene 1                                                |
| lys823 | chr3 | 28131477  | 28131846  |              |         |              |                                                                                        |
| lys824 | chr3 | 31985504  | 31985860  | NM_017784    | -12382  | OSBPL10      | oxysterol binding protein-like 10                                                      |
| lys825 | chr3 | 33197870  | 33198076  | NM_015551    | -37635  | SUSD5        | sushi domain containing 5                                                              |
| lys826 | chr3 | 42096265  | 42096519  | NM_001042646 | -11230  | TRAK1        | trafficking protein, kinesin binding 1                                                 |
| lys827 | chr3 | 50183967  | 50184508  | NM_004186    | 16117   | SEMA3F       | sema domain, immunoglobulin domain (Ig), short basic domain, secreted, (semaphorin) 3F |
| lys828 | chr3 | 50221170  | 50221759  | NM_006841    | 3476    | SLC38A3      | solute carrier family 38, member 3                                                     |
| lys829 | chr3 | 50600606  | 50601186  | NM_016173    | 18695   | HEMK1        | HemK methyltransferase family member 1                                                 |
| lys830 | chr3 | 51629641  | 51629901  | NM_015106    | 79007   | RAD54L2      | RAD54-like 2 ( <i>S. cerevisiae</i> )                                                  |
| lys831 | chr3 | 52464359  | 52464680  | NM_007184    | 0       | NISCH        | nischarin                                                                              |
| lys832 | chr3 | 52713597  | 52714185  | NM_014041    | -711    | SPCS1        | signal peptidase complex subunit 1 homolog ( <i>S. cerevisiae</i> )                    |
| lys833 | chr3 | 58394562  | 58394989  | NM_000925    | 0       | PDHB         | pyruvate dehydrogenase (lipoamide) beta                                                |
| lys834 | chr3 | 67429207  | 67429528  |              |         |              |                                                                                        |
| lys835 | chr3 | 81848805  | 81849232  | NM_000158    | -44408  | GBE1         | glucan (1,4-alpha-), branching enzyme 1                                                |
| lys836 | chr3 | 81893455  | 81893762  | NM_000158    | 0       | GBE1         | glucan (1,4-alpha-), branching enzyme 1                                                |
| lys837 | chr3 | 121027406 | 121027678 | NM_022002    | 43161   | NR1I2        | nuclear receptor subfamily 1, group I, member 2                                        |
| lys838 | chr3 | 121476292 | 121476653 |              |         |              |                                                                                        |
| lys839 | chr3 | 123995218 | 123995495 | NM_024610    | 0       | HSPBAP1      | HSPB (heat shock 27kDa) associated protein 1                                           |
| lys840 | chr3 | 124095769 | 124096120 | NR_024618    | 7721    | LOC100129550 | -                                                                                      |
| lys841 | chr3 | 126036238 | 126036821 | NM_002213    | -52013  | ITGB5        | integrin, beta 5                                                                       |
| lys842 | chr3 | 128294927 | 128295262 |              |         |              |                                                                                        |
| lys843 | chr3 | 129851640 | 129851977 | NM_002950    | -432    | RPN1         | ribophorin I                                                                           |
| lys844 | chr3 | 132704281 | 132704613 | NM_007208    | 0       | MRPL3        | mitochondrial ribosomal protein L3                                                     |
| lys845 | chr3 | 142143060 | 142143416 | NM_018155    | 0       | SLC25A36     | solute carrier family 25, member 36                                                    |
| lys846 | chr3 | 142349259 | 142349489 | NM_080862    | 95828   | SPSB4        | splA/ryanodine receptor domain and SOCS box containing 4                               |
| lys847 | chr3 | 142569585 | 142570072 | NM_001080412 | 43842   | ZBTB38       | zinc finger and BTB domain containing 38                                               |
| lys848 | chr3 | 158320923 | 158321396 |              |         |              |                                                                                        |
| lys849 | chr3 | 158335163 | 158335440 | NM_020307    | -25736  | CCNL1        | cyclin L1                                                                              |
| lys850 | chr3 | 158337147 | 158337724 | NM_020307    | -23452  | CCNL1        | cyclin L1                                                                              |
| lys851 | chr3 | 159568849 | 159569123 | NM_016625    | 258265  | RSRC1        | arginine/serine-rich coiled-coil 1                                                     |
| lys852 | chr3 | 173330374 | 173330719 | NM_001135095 | 89338   | FNDC3B       | fibronectin type III domain containing 3B                                              |
| lys853 | chr3 | 178312035 | 178312372 | NM_024665    | -85370  | TBL1XR1      | transducin (beta)-like 1 X-linked receptor 1                                           |
| lys854 | chr3 | 178398279 | 178398644 | NM_024665    | 538     | TBL1XR1      | transducin (beta)-like 1 X-linked receptor 1                                           |
| lys855 | chr3 | 178539142 | 178539664 |              |         |              |                                                                                        |
| lys856 | chr3 | 178559428 | 178559730 |              |         |              |                                                                                        |
| lys857 | chr3 | 179024629 | 179024874 |              |         |              |                                                                                        |
| lys858 | chr3 | 185514858 | 185515113 | NM_198242    | 0       | EIF4G1       | eukaryotic translation initiation factor 4 gamma, 1                                    |
| lys859 | chr3 | 188061372 | 188061602 | NM_004797    | 18217   | ADIPOQ       | adiponectin, C1Q and collagen domain containing                                        |
| lys860 | chr3 | 189198371 | 189198791 |              |         |              |                                                                                        |
| lys861 | chr3 | 189946578 | 189947158 | NM_005578    | 533165  | LPP          | LIM domain containing preferred translocation partner in lipoma                        |
| lys862 | chr3 | 194912577 | 194913090 | NM_015560    | 118952  | OPA1         | optic atrophy 1 (autosomal dominant)                                                   |
| lys863 | chr3 | 194944456 | 194944860 |              |         |              |                                                                                        |
| lys864 | chr3 | 195696988 | 195697373 |              |         |              |                                                                                        |
| lys865 | chr3 | 196307432 | 196307693 | NM_152531    | -165491 | C3orf21      | chromosome 3 open reading frame 21                                                     |
| lys866 | chr3 | 197100826 | 197101229 | NM_001010938 | -5600   | TNK2         | tyrosine kinase, non-receptor, 2                                                       |
| lys867 | chr3 | 198581980 | 198582416 |              |         |              |                                                                                        |
| lys868 | chr3 | 198676420 | 198676787 |              |         |              |                                                                                        |
| lys869 | chr4 | 677046    | 677373    | NM_032219    | 4074    | MFSD7        | major facilitator superfamily domain containing 7                                      |
| lys870 | chr4 | 1748097   | 1748458   | NM_000142    | -16378  | FGFR3        | fibroblast growth factor receptor 3                                                    |
| lys871 | chr4 | 1769392   | 1770048   | NM_000142    | 4557    | FGFR3        | fibroblast growth factor receptor 3                                                    |
| lys872 | chr4 | 3314063   | 3314258   | NM_198229    | 28393   | RGS12        | regulator of G-protein signaling 12                                                    |
| lys873 | chr4 | 3802560   | 3803051   |              |         |              |                                                                                        |
| lys874 | chr4 | 3808344   | 3808834   |              |         |              |                                                                                        |
| lys875 | chr4 | 4594952   | 4595179   | NM_016930    | 277     | STX18        | syntaxin 18                                                                            |
| lys876 | chr4 | 6946236   | 6946581   | NM_001113361 | -15490  | TBC1D14      | TBC1 domain family, member 14                                                          |
| lys877 | chr4 | 24923197  | 24923521  | NM_024936    | 0       | ZCCHC4       | zinc finger, CCHC domain containing 4                                                  |
| lys878 | chr4 | 37326068  | 37326465  | NM_001085399 | -37929  | RELL1        | RELT-like 1                                                                            |
| lys879 | chr4 | 38169110  | 38169471  |              |         |              |                                                                                        |
| lys880 | chr4 | 38341769  | 38342281  | NM_016531    | 0       | KLF3         | Kruppel-like factor 3 (basic)                                                          |
| lys881 | chr4 | 77446519  | 77446815  | NM_003943    | 0       | STBD1        | starch binding domain 1                                                                |
| lys882 | chr4 | 84150925  | 84151470  | NM_001115008 | 0       | LIN54        | lin-54 homolog ( <i>C. elegans</i> )                                                   |
| lys883 | chr4 | 88418505  | 88419011  |              |         |              |                                                                                        |
| lys884 | chr4 | 104216003 | 104216301 | NM_178833    | -1318   | NHEDC2       | Na <sup>+</sup> /H <sup>+</sup> exchanger domain containing 2                          |
| lys885 | chr4 | 124619386 | 124619916 |              |         |              |                                                                                        |
| lys886 | chr4 | 159135493 | 159135804 |              |         |              |                                                                                        |
| lys887 | chr4 | 166252849 | 166253147 | NM_001100389 | -327    | TMEM192      | transmembrane protein 192                                                              |
| lys888 | chr5 | 1231982   | 1232218   |              |         |              |                                                                                        |
| lys889 | chr5 | 1608379   | 1608919   | NR_003263    | -38727  | SDHAP3       | succinate dehydrogenase complex, subunit A, flavoprotein pseudogene 3                  |
| lys890 | chr5 | 5414185   | 5414518   |              |         |              |                                                                                        |
| lys891 | chr5 | 30540810  | 30541163  |              |         |              |                                                                                        |
| lys892 | chr5 | 38185065  | 38185291  |              |         |              |                                                                                        |
| lys893 | chr5 | 71182498  | 71182587  |              |         |              |                                                                                        |
| lys894 | chr5 | 71182613  | 71182694  |              |         |              |                                                                                        |
| lys895 | chr5 | 72876015  | 72876762  | NM_023039    | -20492  | ANKRA2       | ankyrin repeat, family A (RFXANK-like), 2                                              |
| lys896 | chr5 | 74207602  | 74208429  | NM_015566    | 9232    | FAM169A      | family with sequence similarity 169, member A                                          |
| lys897 | chr5 | 75735770  | 75736372  | NM_006633    | 867     | IQGAP2       | IQ motif containing GTPase activating protein 2                                        |
| lys898 | chr5 | 90242666  | 90243061  | NM_032119    | 352295  | GPR98        | G protein-coupled receptor 98                                                          |
| lys899 | chr5 | 90246975  | 90247320  | NM_032119    | 356604  | GPR98        | G protein-coupled receptor 98                                                          |
| lys900 | chr5 | 95659416  | 95659752  |              |         |              |                                                                                        |
| lys901 | chr5 | 132022273 | 132022562 | NM_002188    | 511     | IL13         | interleukin 13                                                                         |
| lys902 | chr5 | 132202127 | 132202500 | NM_133456    | 12227   | SHROOM1      | shroom family member 1                                                                 |
| lys903 | chr5 | 133869722 | 133870355 | NM_015288    | -19341  | PHF15        | PHD finger protein 15                                                                  |
| lys904 | chr5 | 134497563 | 134497969 |              |         |              |                                                                                        |
| lys905 | chr5 | 134626718 | 134627278 |              |         |              |                                                                                        |
| lys906 | chr5 | 134693655 | 134694137 | NM_001040158 | -68690  | H2AFY        | H2A histone family, member Y                                                           |
| lys907 | chr5 | 138561812 | 138562253 | NM_001037633 | 0       | SIL1         | SIL1 homolog, endoplasmic reticulum chaperone ( <i>S. cerevisiae</i> )                 |
| lys908 | chr5 | 139002794 | 139003275 | NM_016463    | -5209   | CXXC5        | CXXC finger 5                                                                          |
| lys909 | chr5 | 140978672 | 140979165 | NM_005219    | 0       | DIAPH1       | diaphanous homolog 1 ( <i>Drosophila</i> )                                             |
| lys910 | chr5 | 141372639 | 141372974 | NM_005471    | 0       | GNPDA1       | glucosamine-6-phosphate deaminase 1                                                    |

|         |      |           |           |              |         |          |                                                                   |  |
|---------|------|-----------|-----------|--------------|---------|----------|-------------------------------------------------------------------|--|
| lys911  | chr5 | 143054162 | 143054489 |              |         |          |                                                                   |  |
| lys912  | chr5 | 149882142 | 149882765 | NM_001543    | 14277   | NDST1    | N-deacetylase/N-sulfotransferase (heparan glucosaminyl) 1         |  |
| lys913  | chr5 | 156650885 | 156651318 | NM_014376    | 21947   | CYFIP2   | cytoplasmic FMR1 interacting protein 2                            |  |
| lys914  | chr5 | 170748040 | 170748318 | NM_001037738 | 639     | NPM1     | nucleophosmin (nucleolar phosphoprotein B23, numatrin)            |  |
| lys915  | chr5 | 172192303 | 172192613 | NM_001031711 | -1215   | ERGIC1   | endoplasmic reticulum-golgi intermediate compartment (ERGIC) 1    |  |
| lys916  | chr5 | 172212262 | 172212835 | NM_001031711 | 18435   | ERGIC1   | endoplasmic reticulum-golgi intermediate compartment (ERGIC) 1    |  |
| lys917  | chr5 | 172218281 | 172218654 | NM_001031711 | 24454   | ERGIC1   | endoplasmic reticulum-golgi intermediate compartment (ERGIC) 1    |  |
| lys918  | chr5 | 172218808 | 172219365 | NM_001031711 | 24981   | ERGIC1   | endoplasmic reticulum-golgi intermediate compartment (ERGIC) 1    |  |
| lys919  | chr5 | 172973110 | 172973391 | NM_001159651 | -2881   | BOD1     | bioorientation of chromosomes in cell division 1                  |  |
| lys920  | chr5 | 172982967 | 172983227 | NM_001159651 | 6696    | BOD1     | bioorientation of chromosomes in cell division 1                  |  |
| lys921  | chr5 | 173030728 | 173031073 |              |         |          |                                                                   |  |
| lys922  | chr5 | 173162313 | 173162667 |              |         |          |                                                                   |  |
| lys923  | chr5 | 173166294 | 173166583 |              |         |          |                                                                   |  |
| lys924  | chr5 | 173328957 | 173329608 | NM_001144954 | -19159  | C5orf47  | chromosome 5 open reading frame 47                                |  |
| lys925  | chr5 | 178624574 | 178624824 | NM_014244    | -80111  | ADAMT52  | ADAM metalloproteinase with thrombospondin type 1 motif, 2        |  |
| lys926  | chr6 | 1209272   | 1209541   |              |         |          |                                                                   |  |
| lys927  | chr6 | 2460163   | 2460549   |              |         |          |                                                                   |  |
| lys928  | chr6 | 3084520   | 3084758   | NM_001069    | -18024  | TUBB2A   | tubulin, beta 2A                                                  |  |
| lys929  | chr6 | 3858817   | 3859103   |              |         |          |                                                                   |  |
| lys930  | chr6 | 5004648   | 5004932   |              |         |          |                                                                   |  |
| lys931  | chr6 | 5151152   | 5151460   | NM_020408    | -54707  | LYRM4    | LYR motif containing 4                                            |  |
| lys932  | chr6 | 7164608   | 7164901   | NM_001003699 | 11423   | RREB1    | ras responsive element binding protein 1                          |  |
| lys933  | chr6 | 7488006   | 7488577   | NM_001008844 | 1139    | DSP      | desmoplakin                                                       |  |
| lys934  | chr6 | 7506515   | 7507166   | NM_001008844 | 19648   | DSP      | desmoplakin                                                       |  |
| lys935  | chr6 | 11467249  | 11467690  | NM_001142393 | -22877  | NEDD9    | neural precursor cell expressed, developmentally down-regulated 9 |  |
| lys936  | chr6 | 11500747  | 11501158  | NM_001142393 | 10181   | NEDD9    | neural precursor cell expressed, developmentally down-regulated 9 |  |
| lys937  | chr6 | 11501265  | 11501603  | NM_001142393 | 10699   | NEDD9    | neural precursor cell expressed, developmentally down-regulated 9 |  |
| lys938  | chr6 | 31977291  | 31977620  | NM_181842    | -128    | ZBTB12   | zinc finger and BTB domain containing 12                          |  |
| lys939  | chr6 | 32003039  | 32003329  | NM_000063    | 0       | C2       | complement component 2                                            |  |
| lys940  | chr6 | 33689018  | 33689402  | NM_002224    | -7736   | ITPR3    | inositol 1,4,5-triphosphate receptor, type 3                      |  |
| lys941  | chr6 | 37203778  | 37204094  |              |         |          |                                                                   |  |
| lys942  | chr6 | 37223788  | 37224166  |              |         |          |                                                                   |  |
| lys943  | chr6 | 41595028  | 41595395  |              |         |          |                                                                   |  |
| lys944  | chr6 | 41595511  | 41595879  |              |         |          |                                                                   |  |
| lys945  | chr6 | 42227084  | 42227361  | NM_000409    | -3760   | GUCA1A   | guanylate cyclase activator 1A (retina)                           |  |
| lys946  | chr6 | 43343396  | 43343809  | NM_032538    | 24198   | TTBK1    | tau tubulin kinase 1                                              |  |
| lys947  | chr6 | 43345703  | 43346497  | NM_032538    | 26505   | TTBK1    | tau tubulin kinase 1                                              |  |
| lys948  | chr6 | 44299336  | 44299786  | NM_001078177 | 0       | SLC29A1  | solute carrier family 29 (nucleoside transporters), member 1      |  |
| lys949  | chr6 | 47148820  | 47149416  |              |         |          |                                                                   |  |
| lys950  | chr6 | 47151514  | 47152171  |              |         |          |                                                                   |  |
| lys951  | chr6 | 47152511  | 47152968  |              |         |          |                                                                   |  |
| lys952  | chr6 | 47438656  | 47438917  |              |         |          |                                                                   |  |
| lys953  | chr6 | 53107546  | 53108146  | NM_003643    | -13437  | GCM1     | glial cells missing homolog 1 (Drosophila)                        |  |
| lys954  | chr6 | 86410168  | 86410460  | NM_001159677 | 407     | SYNCRIP  | synaptotagmin binding, cytoplasmic RNA interacting protein        |  |
| lys955  | chr6 | 87921562  | 87922094  | NM_015021    | 0       | ZNF292   | zinc finger protein 292                                           |  |
| lys956  | chr6 | 96359572  | 96360138  |              |         |          |                                                                   |  |
| lys957  | chr6 | 96370046  | 96370353  |              |         |          |                                                                   |  |
| lys958  | chr6 | 109810240 | 109810578 | NM_006016    | 0       | CD164    | CD164 molecule, sialomucin                                        |  |
| lys959  | chr6 | 110982848 | 110983375 |              |         |          |                                                                   |  |
| lys960  | chr6 | 111686983 | 111687389 | NM_153369    | 0       | KIAA1919 | KIAA1919                                                          |  |
| lys961  | chr6 | 126184615 | 126185030 | NM_181782    | 30923   | NCOA7    | nuclear receptor coactivator 7                                    |  |
| lys962  | chr6 | 126440133 | 126440424 |              |         |          |                                                                   |  |
| lys963  | chr6 | 129713203 | 129713525 | NM_000426    | 467226  | LAMA2    | laminin, alpha 2                                                  |  |
| lys964  | chr6 | 132339364 | 132339874 |              |         |          |                                                                   |  |
| lys965  | chr6 | 132343496 | 132344141 |              |         |          |                                                                   |  |
| lys966  | chr6 | 138086075 | 138086574 |              |         |          |                                                                   |  |
| lys967  | chr6 | 138086868 | 138087234 |              |         |          |                                                                   |  |
| lys968  | chr6 | 138585866 | 138586076 | NM_021635    | 4547    | PBOV1    | prostate and breast cancer overexpressed 1                        |  |
| lys969  | chr6 | 149395807 | 149396149 | NM_005715    | 285845  | UST      | uronyl-2-sulfotransferase                                         |  |
| lys970  | chr6 | 151228978 | 151229465 | NM_015440    | 596     | MTFHD1L  | methylenetetrahydrofolate dehydrogenase (NADP+ dependent) 1-like  |  |
| lys971  | chr6 | 155677839 | 155678050 | NM_016020    | 522     | TFB1M    | transcription factor B1, mitochondrial                            |  |
| lys972  | chr6 | 158573070 | 158573389 |              |         |          |                                                                   |  |
| lys973  | chr6 | 158663743 | 158664259 | NM_020245    | 10065   | TULP4    | tubby like protein 4                                              |  |
| lys974  | chr6 | 160103679 | 160103983 | NM_005891    | 702     | ACAT2    | acetyl-CoA acetyltransferase 2                                    |  |
| lys975  | chr6 | 160478190 | 160478893 | NM_153187    | 15339   | SLC22A1  | solute carrier family 22 (organic cation transporter), member 1   |  |
| lys976  | chr6 | 166694588 | 166694927 | NM_145169    | 18608   | SFT2D1   | SFT2 domain containing 1                                          |  |
| lys977  | chr6 | 167731728 | 167732249 | NM_004610    | 13741   | TCP10    | t-complex 10 homolog (mouse)                                      |  |
| lys978  | chr6 | 167811760 | 167812109 |              |         |          |                                                                   |  |
| lys979  | chr6 | 167819570 | 167820038 |              |         |          |                                                                   |  |
| lys980  | chr6 | 167826475 | 167827179 |              |         |          |                                                                   |  |
| lys981  | chr6 | 167905808 | 167906215 |              |         |          |                                                                   |  |
| lys982  | chr6 | 169941512 | 169942006 | NR_026781    | 667     | C6orf122 | non-protein coding RNA 242                                        |  |
| lys983  | chr7 | 558898    | 559343    | NM_002735    | -159316 | PRKAR1B  | protein kinase, cAMP-dependent, regulatory, type I, beta          |  |
| lys984  | chr7 | 963997    | 964472    | NM_006869    | 3183    | ADAP1    | ArfGAP with dual PH domains 1                                     |  |
| lys985  | chr7 | 966624    | 966910    | NM_006869    | 5810    | ADAP1    | ArfGAP with dual PH domains 1                                     |  |
| lys986  | chr7 | 1719948   | 1720388   |              |         |          |                                                                   |  |
| lys987  | chr7 | 1824067   | 1824146   | NM_001013837 | -414963 | MAD1L1   | MAD1 mitotic arrest deficient-like 1 (yeast)                      |  |
| lys988  | chr7 | 2320462   | 2320950   | NM_013321    | 0       | SNX8     | sorting nexin 8                                                   |  |
| lys989  | chr7 | 2669294   | 2669557   | NM_133463    | -16131  | AMZ1     | archaelysin family metalloproteinase 1                            |  |
| lys990  | chr7 | 3004835   | 3005047   | NM_032415    | -45058  | CARD11   | caspace recruitment domain family, member 11                      |  |
| lys991  | chr7 | 4140933   | 4141208   | NM_001079653 | 5092    | SDK1     | sidekick homolog 1, cell adhesion molecule (chicken)              |  |
| lys992  | chr7 | 4647739   | 4648437   |              |         |          |                                                                   |  |
| lys993  | chr7 | 4748321   | 4748605   | NM_001037165 | 59867   | FOXK1    | forkhead box K1                                                   |  |
| lys994  | chr7 | 5540102   | 5540329   | NM_001101    | 3345    | ACTB     | actin, beta                                                       |  |
| lys995  | chr7 | 12646512  | 12646802  | NM_033128    | 50841   | SCIN     | scinderin                                                         |  |
| lys996  | chr7 | 12653918  | 12654216  | NM_033128    | 58247   | SCIN     | scinderin                                                         |  |
| lys997  | chr7 | 12947731  | 12948021  |              |         |          |                                                                   |  |
| lys998  | chr7 | 17105681  | 17106068  |              |         |          |                                                                   |  |
| lys999  | chr7 | 22860237  | 22860746  | NR_003075    | -2010   | SNORD93  | small nucleolar RNA, C/D box 93                                   |  |
| lys1000 | chr7 | 23340848  | 23341143  | NM_006547    | -135377 | IGF2BP3  | insulin-like growth factor 2 mRNA binding protein 3               |  |
| lys1001 | chr7 | 27699978  | 27700228  |              |         |          |                                                                   |  |
| lys1002 | chr7 | 29412030  | 29412368  | NM_004067    | 211386  | CHN2     | chimerin (chimaerin) 2                                            |  |

|         |      |           |           |              |         |           |                                                                                                 |
|---------|------|-----------|-----------|--------------|---------|-----------|-------------------------------------------------------------------------------------------------|
| lys1003 | chr7 | 36298169  | 36298481  | NM_030636    | 138810  | EEDP1     | endonuclease/exonuclease/phosphatase family domain containing 1                                 |
| lys1004 | chr7 | 40761530  | 40761893  | NM_024728    | 620432  | C7orf10   | chromosome 7 open reading frame 10                                                              |
| lys1005 | chr7 | 41322554  | 41322853  |              |         |           |                                                                                                 |
| lys1006 | chr7 | 47506310  | 47506676  | NM_022748    | -39048  | TNS3      | tensin 3                                                                                        |
| lys1007 | chr7 | 47721907  | 47722234  |              |         |           |                                                                                                 |
| lys1008 | chr7 | 51300850  | 51301092  | NM_015198    | -50917  | COBL      | cordons-bleu homolog (mouse)                                                                    |
| lys1009 | chr7 | 65245491  | 65245674  | NM_001040647 | 28253   | CRCP      | CGRP receptor component                                                                         |
| lys1010 | chr7 | 72700114  | 72700649  | NM_001077621 | -19460  | VPS37D    | vacuolar protein sorting 37 homolog D (S. cerevisiae)                                           |
| lys1011 | chr7 | 73546555  | 73546864  | NM_005685    | 40184   | GTF2IRD1  | GTF2I repeat domain containing 1                                                                |
| lys1012 | chr7 | 75155789  | 75156312  | NM_005338    | -49903  | HIP1      | huntingtin interacting protein 1                                                                |
| lys1013 | chr7 | 75320076  | 75320433  |              |         |           |                                                                                                 |
| lys1014 | chr7 | 75387717  | 75388419  | NM_000941    | 5363    | POR       | P450 (cytochrome) oxidoreductase                                                                |
| lys1015 | chr7 | 75716635  | 75716994  | NM_001110199 | 47485   | FLJ37078  | serine/arginine repetitive matrix 3                                                             |
| lys1016 | chr7 | 87015872  | 87016159  | NM_000927    | -164341 | ABCB1     | ATP-binding cassette, sub-family B (MDR/TAP), member 1                                          |
| lys1017 | chr7 | 95789191  | 95789751  | NM_014251    | 0       | SLC25A13  | solute carrier family 25, member 13 (citrin)                                                    |
| lys1018 | chr7 | 95794743  | 95794960  | NM_014251    | 5349    | SLC25A13  | solute carrier family 25, member 13 (citrin)                                                    |
| lys1019 | chr7 | 99459652  | 99459947  | NM_003439    | 8499    | ZKSCAN1   | zinc finger with KRAB and SCAN domains 1                                                        |
| lys1020 | chr7 | 99472293  | 99472815  | NM_145914    | -12537  | ZSCAN21   | zinc finger and SCAN domain containing 21                                                       |
| lys1021 | chr7 | 99879929  | 99880579  | NM_145030    | 7900    | C7orf47   | chromosome 7 open reading frame 47                                                              |
| lys1022 | chr7 | 99981254  | 99981636  | NM_006076    | 6486    | AGFG2     | ArfGAP with FG repeats 2                                                                        |
| lys1023 | chr7 | 100003810 | 100004046 | NM_002319    | -17666  | LRCH4     | leucine-rich repeats and calponin homology (CH) domain containing 4                             |
| lys1024 | chr7 | 100129935 | 100130263 | NM_022574    | 5130    | GIGYF1    | GRB10 interacting GYF protein 1                                                                 |
| lys1025 | chr7 | 100556264 | 100556722 | NM_000602    | -376    | SERPINE1  | serpin peptidase inhibitor, clade E (nexin, plasminogen activator inhibitor type 1), member 1   |
| lys1026 | chr7 | 100556747 | 100557145 | NM_000602    | 0       | SERPINE1  | serpin peptidase inhibitor, clade E (nexin, plasminogen activator inhibitor type 1), member 1   |
| lys1027 | chr7 | 101703671 | 101704284 | NM_020979    | -10840  | SH2B2     | SH2B adaptor protein 2                                                                          |
| lys1028 | chr7 | 130248464 | 130249118 |              |         |           |                                                                                                 |
| lys1029 | chr7 | 130392405 | 130392812 | NR_024153    | -49517  | FLJ43663  | -                                                                                               |
| lys1030 | chr7 | 137452211 | 137452455 | NM_005989    | 40477   | AKR1D1    | aldo-keto reductase family 1, member D1 (delta 4-3-ketosteroid-5-beta-reductase)                |
| lys1031 | chr7 | 139575777 | 139576148 |              |         |           |                                                                                                 |
| lys1032 | chr7 | 139576827 | 139577071 |              |         |           |                                                                                                 |
| lys1033 | chr7 | 149696450 | 149697243 | NM_013400    | 0       | REPIN1    | replication initiator 1                                                                         |
| lys1034 | chr7 | 150390306 | 150390728 | NM_003040    | 2718    | SLC4A2    | solute carrier family 4, anion exchanger, member 2 (erythrocyte membrane protein band 3-like 1) |
| lys1035 | chr7 | 155168004 | 155168330 | NM_053043    | 38042   | RBM33     | RNA binding motif protein 33                                                                    |
| lys1036 | chr7 | 156759008 | 156759305 | NM_014671    | 134594  | UBE3C     | ubiquitin protein ligase E3C                                                                    |
| lys1037 | chr7 | 157339693 | 157340112 | NM_130843    | -733131 | PTPRN2    | protein tyrosine phosphatase, receptor type, N polypeptide 2                                    |
| lys1038 | chr7 | 157749714 | 157750107 | NM_130843    | -323136 | PTPRN2    | protein tyrosine phosphatase, receptor type, N polypeptide 2                                    |
| lys1039 | chr7 | 157984219 | 157984543 | NM_130843    | -88700  | PTPRN2    | protein tyrosine phosphatase, receptor type, N polypeptide 2                                    |
| lys1040 | chr7 | 158067183 | 158067475 | NM_130843    | -5768   | PTPRN2    | protein tyrosine phosphatase, receptor type, N polypeptide 2                                    |
| lys1041 | chr7 | 158076122 | 158076567 | NM_130843    | 2880    | PTPRN2    | protein tyrosine phosphatase, receptor type, N polypeptide 2                                    |
| lys1042 | chr7 | 158111882 | 158112076 | NM_017760    | -78205  | NCAPG2    | non-SMC condensin II complex, subunit G2                                                        |
| lys1043 | chr8 | 570938    | 571215    |              |         |           |                                                                                                 |
| lys1044 | chr8 | 8322641   | 8322914   |              |         |           |                                                                                                 |
| lys1045 | chr8 | 8324292   | 8324650   |              |         |           |                                                                                                 |
| lys1046 | chr8 | 9677377   | 9677690   | NM_003747    | 226524  | TNKS      | tankyrase, TRF1-interacting ankyrin-related ADP-ribose polymerase                               |
| lys1047 | chr8 | 10465210  | 10465483  |              |         |           |                                                                                                 |
| lys1048 | chr8 | 11772051  | 11772280  | NM_147781    | 8997    | CTSB      | cathepsin B                                                                                     |
| lys1049 | chr8 | 17239827  | 17240140  | NM_004686    | -75271  | MTMR7     | myotubularin related protein 7                                                                  |
| lys1050 | chr8 | 17516557  | 17516881  | NM_006207    | 37573   | PDGFRL    | platelet-derived growth factor receptor-like                                                    |
| lys1051 | chr8 | 17690270  | 17690554  | NM_001001925 | -12152  | MTUS1     | microtubule associated tumor suppressor 1                                                       |
| lys1052 | chr8 | 17797687  | 17798346  | NM_201552    | 361     | FGL1      | fibrinogen-like 1                                                                               |
| lys1053 | chr8 | 17809078  | 17809394  | NM_201552    | 11752   | FGL1      | fibrinogen-like 1                                                                               |
| lys1054 | chr8 | 21937461  | 21937749  | NM_182795    | -550    | NPM2      | nucleophosmin/nucleoplasmin 2                                                                   |
| lys1055 | chr8 | 22270055  | 22270370  | NM_001135154 | -10336  | SLC39A14  | solute carrier family 39 (zinc transporter), member 14                                          |
| lys1056 | chr8 | 22324902  | 22325252  | NM_001135153 | 43909   | SLC39A14  | solute carrier family 39 (zinc transporter), member 14                                          |
| lys1057 | chr8 | 25113102  | 25113376  | NM_024940    | 14900   | DOCK5     | dedicator of cytokinesis 5                                                                      |
| lys1058 | chr8 | 27213129  | 27213643  | NM_171982    | -11108  | TRIM35    | tripartite motif-containing 35                                                                  |
| lys1059 | chr8 | 28315273  | 28315778  | NM_018660    | 15378   | ZNF395    | zinc finger protein 395                                                                         |
| lys1060 | chr8 | 29686887  | 29687200  |              |         |           |                                                                                                 |
| lys1061 | chr8 | 33081969  | 33082399  |              |         |           |                                                                                                 |
| lys1062 | chr8 | 37651913  | 37652351  |              |         |           |                                                                                                 |
| lys1063 | chr8 | 37876115  | 37876579  | NM_001002814 | 0       | RAB11FIP1 | RAB11 family interacting protein 1 (class I)                                                    |
| lys1064 | chr8 | 42517364  | 42517872  | NM_006749    | 1140    | SLC20A2   | solute carrier family 20 (phosphate transporter), member 2                                      |
| lys1065 | chr8 | 49117492  | 49117722  | NM_003350    | 33946   | UBE2V2    | ubiquitin-conjugating enzyme E2 variant 2                                                       |
| lys1066 | chr8 | 53770403  | 53770828  | NM_014781    | -18751  | RB1CC1    | RB1-inducible coiled-coil 1                                                                     |
| lys1067 | chr8 | 59247701  | 59248035  |              |         |           |                                                                                                 |
| lys1068 | chr8 | 71477246  | 71477682  | NM_006540    | -892    | NCOA2     | nuclear receptor coactivator 2                                                                  |
| lys1069 | chr8 | 92189312  | 92189616  | NM_001129890 | 5291    | LRRC69    | leucine rich repeat containing 69                                                               |
| lys1070 | chr8 | 96182758  | 96183184  |              |         |           |                                                                                                 |
| lys1071 | chr8 | 98244781  | 98245138  | NM_016134    | 518108  | PGCP      | -                                                                                               |
| lys1072 | chr8 | 103497952 | 103498230 | NM_015902    | 4282    | UBR5      | ubiquitin protein ligase E3 component n-recognin 5                                              |
| lys1073 | chr8 | 103735201 | 103735815 | NM_001032282 | 0       | KLF10     | Kruppel-like factor 10                                                                          |
| lys1074 | chr8 | 103737053 | 103737899 | NM_005655    | 0       | KLF10     | Kruppel-like factor 10                                                                          |
| lys1075 | chr8 | 103887548 | 103888671 | NM_015878    | -56902  | AZIN1     | antizyme inhibitor 1                                                                            |
| lys1076 | chr8 | 103888785 | 103889220 | NM_015878    | -56353  | AZIN1     | antizyme inhibitor 1                                                                            |
| lys1077 | chr8 | 119062190 | 119062415 | NM_000127    | -130824 | EXT1      | exostosin 1                                                                                     |
| lys1078 | chr8 | 121890950 | 121891481 | NM_021021    | -2009   | SNTB1     | syntrophin, beta 1 (dystrophin-associated protein A1, 59kDa, basic component 1)                 |
| lys1079 | chr8 | 121909043 | 121909397 | NM_021021    | 15554   | SNTB1     | syntrophin, beta 1 (dystrophin-associated protein A1, 59kDa, basic component 1)                 |
| lys1080 | chr8 | 122430174 | 122430538 |              |         |           |                                                                                                 |
| lys1081 | chr8 | 125712499 | 125712933 | NM_014751    | -96978  | MTSS1     | metastasis suppressor 1                                                                         |
| lys1082 | chr8 | 125805667 | 125806195 | NM_014751    | -3716   | MTSS1     | metastasis suppressor 1                                                                         |
| lys1083 | chr8 | 126493879 | 126494304 | NM_025195    | -17440  | TRIB1     | tribbles homolog 1 (Drosophila)                                                                 |
| lys1084 | chr8 | 126510575 | 126510829 | NM_025195    | -915    | TRIB1     | tribbles homolog 1 (Drosophila)                                                                 |
| lys1085 | chr8 | 126583016 | 126583561 |              |         |           |                                                                                                 |
| lys1086 | chr8 | 129636257 | 129636942 |              |         |           |                                                                                                 |
| lys1087 | chr8 | 129637924 | 129638462 |              |         |           |                                                                                                 |
| lys1088 | chr8 | 134451329 | 134451654 |              |         |           |                                                                                                 |

|         |      |           |           |              |         |          |                                                                                                  |
|---------|------|-----------|-----------|--------------|---------|----------|--------------------------------------------------------------------------------------------------|
| lys1089 | chr8 | 134530106 | 134530448 | NM_173344    | -122917 | ST3GAL1  | ST3 beta-galactoside alpha-2,3-sialyltransferase 1                                               |
| lys1090 | chr8 | 141050068 | 141050376 | NM_001160372 | -486667 | TRAPPC9  | trafficking protein particle complex 9                                                           |
| lys1091 | chr8 | 142307730 | 142308067 | NM_001080431 | 0       | SLC45A4  | solute carrier family 45, member 4                                                               |
| lys1092 | chr8 | 144672564 | 144673045 | NM_015117    | -21718  | ZC3H3    | zinc finger CCCH-type containing 3                                                               |
| lys1093 | chr8 | 145048723 | 145049202 | NM_201384    | -36544  | PLEC1    | plectin                                                                                          |
| lys1094 | chr9 | 6670936   | 6671471   |              |         |          |                                                                                                  |
| lys1095 | chr9 | 6887871   | 6888129   | NM_015061    | 140232  | KDM4C    | lysine (K)-specific demethylase 4C                                                               |
| lys1096 | chr9 | 19151753  | 19152008  |              |         |          |                                                                                                  |
| lys1097 | chr9 | 37371391  | 37371714  |              |         |          |                                                                                                  |
| lys1098 | chr9 | 37956688  | 37956948  | NM_003028    | -102262 | SHB      | Src homology 2 domain containing adaptor protein B                                               |
| lys1099 | chr9 | 38371008  | 38371443  | NM_000692    | -11258  | ALDH1B1  | aldehyde dehydrogenase 1 family, member B1                                                       |
| lys1100 | chr9 | 38378834  | 38379176  | NM_000692    | -3525   | ALDH1B1  | aldehyde dehydrogenase 1 family, member B1                                                       |
| lys1101 | chr9 | 70621898  | 70622137  | NM_003558    | 111464  | PIP5K1B  | phosphatidylinositol-4-phosphate 5-kinase, type I, beta                                          |
| lys1102 | chr9 | 72275206  | 72275492  |              |         |          |                                                                                                  |
| lys1103 | chr9 | 78376476  | 78376706  |              |         |          |                                                                                                  |
| lys1104 | chr9 | 92840102  | 92840386  |              |         |          |                                                                                                  |
| lys1105 | chr9 | 92999254  | 92999680  | NM_001698    | -164347 | AUH      | AU RNA binding protein/enoyl-CoA hydratase                                                       |
| lys1106 | chr9 | 92999896  | 93000295  | NM_001698    | -163732 | AUH      | AU RNA binding protein/enoyl-CoA hydratase                                                       |
| lys1107 | chr9 | 94914523  | 94914881  | NM_032310    | 16254   | C9orf89  | chromosome 9 open reading frame 89                                                               |
| lys1108 | chr9 | 94935701  | 94935960  | NM_004148    | -431    | NINJ1    | ninjurin 1                                                                                       |
| lys1109 | chr9 | 95003672  | 95004197  | NM_006648    | 16641   | WNK2     | WNK lysine deficient protein kinase 2                                                            |
| lys1110 | chr9 | 96773554  | 96773856  | NM_032823    | 244741  | C9orf3   | chromosome 9 open reading frame 3                                                                |
| lys1111 | chr9 | 96792008  | 96792398  | NM_032823    | 263195  | C9orf3   | chromosome 9 open reading frame 3                                                                |
| lys1112 | chr9 | 96833838  | 96834324  | NM_032823    | 305025  | C9orf3   | chromosome 9 open reading frame 3                                                                |
| lys1113 | chr9 | 97573658  | 97573941  |              |         |          |                                                                                                  |
| lys1114 | chr9 | 98238541  | 98238869  | NM_014282    | -13365  | HABP4    | hyaluronan binding protein 4                                                                     |
| lys1115 | chr9 | 98414288  | 98414568  | NM_033331    | -7365   | CDC14B   | CDC14 cell division cycle 14 homolog B (S. cerevisiae)                                           |
| lys1116 | chr9 | 103125966 | 103126316 | NM_017753    | 138830  | PRG-3    | -                                                                                                |
| lys1117 | chr9 | 106667000 | 106667274 | NM_005502    | -62983  | ABCA1    | ATP-binding cassette, sub-family A (ABC1), member 1                                              |
| lys1118 | chr9 | 110696369 | 110696709 | NM_003640    | -39720  | IKBKAP   | inhibitor of kappa light polypeptide gene enhancer in B-cells, kinase complex-associated protein |
| lys1119 | chr9 | 115925798 | 115926169 |              |         |          |                                                                                                  |
| lys1120 | chr9 | 115965660 | 115965958 | NM_032888    | 7610    | COL27A1  | collagen, type XXVII, alpha 1                                                                    |
| lys1121 | chr9 | 122373902 | 122374342 | NM_018249    | -7916   | CDK5RAP2 | CDK5 regulatory subunit associated protein 2                                                     |
| lys1122 | chr9 | 125272319 | 125272737 | NM_024820    | -459501 | DENND1A  | DENN/MADD domain containing 1A                                                                   |
| lys1123 | chr9 | 128329448 | 128329956 |              |         |          |                                                                                                  |
| lys1124 | chr9 | 128507452 | 128507708 | NM_002316    | 90885   | LMX1B    | LIM homeobox transcription factor 1, beta                                                        |
| lys1125 | chr9 | 129409613 | 129409850 | NM_001032221 | -4456   | STXBP1   | syntaxin binding protein 1                                                                       |
| lys1126 | chr9 | 129824217 | 129824603 |              |         |          |                                                                                                  |
| lys1127 | chr9 | 129905079 | 129905489 | NM_001006643 | 4424    | SLC25A25 | solute carrier family 25 (mitochondrial carrier; phosphate carrier), member 25                   |
| lys1128 | chr9 | 129917320 | 129917716 | NM_025072    | -12579  | PTGES2   | prostaglandin E synthase 2                                                                       |
| lys1129 | chr9 | 131145864 | 131146262 |              |         |          |                                                                                                  |
| lys1130 | chr9 | 131245136 | 131245374 |              |         |          |                                                                                                  |
| lys1131 | chr9 | 131359528 | 131359930 |              |         |          |                                                                                                  |
| lys1132 | chr9 | 131360853 | 131361500 |              |         |          |                                                                                                  |
| lys1133 | chr9 | 132315670 | 132315976 | NM_054012    | 5757    | ASS1     | argininosuccinate synthase 1                                                                     |
| lys1134 | chr9 | 132959923 | 132960185 | NM_031426    | -1547   | AIF1L    | allograft inflammatory factor 1-like                                                             |
| lys1135 | chr9 | 133471406 | 133471787 | NM_198679    | -103263 | RAPGEF1  | Rap guanine nucleotide exchange factor (GEF) 1                                                   |
| lys1136 | chr9 | 135913202 | 135913610 | NM_007371    | -9352   | BRD3     | bromodomain containing 3                                                                         |
| lys1137 | chr9 | 135996240 | 135996544 | NM_052821    | 1507    | WDR5     | WD repeat domain 5                                                                               |
| lys1138 | chr9 | 136355381 | 136355665 | NM_002957    | -2471   | RXRA     | retinoid X receptor, alpha                                                                       |
| lys1139 | chr9 | 136370162 | 136370456 | NM_002957    | 12027   | RXRA     | retinoid X receptor, alpha                                                                       |
| lys1140 | chr9 | 136401300 | 136401709 | NM_002957    | 43165   | RXRA     | retinoid X receptor, alpha                                                                       |
| lys1141 | chr9 | 138755294 | 138755534 | NM_001001712 | -1698   | LCN10    | lipocalin 10                                                                                     |
| lys1142 | chr9 | 139249937 | 139250233 | NM_080877    | 4733    | SLC34A3  | solute carrier family 34 (sodium phosphate), member 3                                            |
| lys1143 | chr9 | 139469162 | 139469514 | NM_015537    | -4093   | NELF     | nasal embryonic LHRH factor                                                                      |
| lys1144 | chr9 | 139685157 | 139685459 | NM_024757    | 51894   | EHMT1    | euchromatic histone-lysine N-methyltransferase 1                                                 |
| lys1145 | chrX | 20234768  | 20234968  |              |         |          |                                                                                                  |
| lys1146 | chrX | 38547747  | 38548363  | NM_021242    | 0       | MID1IP1  | MID1 interacting protein 1 (gastrulation specific G12 homolog (zebrafish))                       |
| lys1147 | chrX | 87746509  | 87746882  |              |         |          |                                                                                                  |
| lys1148 | chrX | 108184307 | 108184493 |              |         |          |                                                                                                  |
| lys1149 | chrX | 108869926 | 108870261 | NM_004458    | 6650    | ACSL4    | acyl-CoA synthetase long-chain family member 4                                                   |
| lys1150 | chrX | 117994037 | 117994427 | NM_024778    | 1298    | LONRF3   | LON peptidase N-terminal domain and ring finger 3                                                |
| lys1151 | chrX | 152541735 | 152541934 | NM_001395    | -19156  | DUSP9    | dual specificity phosphatase 9                                                                   |
| lys1152 | chrX | 153850856 | 153851026 | NM_000132    | -53166  | F8       | coagulation factor VIII, procoagulant component                                                  |
| lys1153 | chrX | 153866131 | 153866276 | NM_000132    | -37916  | F8       | coagulation factor VIII, procoagulant component                                                  |
