# Supplementary material for: Integrated Expression Profiling and Genome-Wide Analysis of ChREBP Targets Reveals the Dual Role for ChREBP in Glucose-Regulated Gene Expression
Source: PubMed Central journal article supplement (PMC3141076; doi:10.1371/journal.pone.0022544), 2011-07-21
Supplement: pone.0022544.s004.pdf [file pone.0022544.s004.pdf]

**Table S2. Functional annotation clustering of the ChREBP ChIP-seq dataset.**

| <b>Annotation Cluster 1</b> |                                                                  | <b>Enrichment Score: 2.62</b> |     |         |     |
|-----------------------------|------------------------------------------------------------------|-------------------------------|-----|---------|-----|
| Category                    | Term                                                             | Number                        | %   | p-Value | FDR |
| GOTERM_MF_ALL               | GO:0046983~protein dimerization activity                         | 41                            | 5.5 | 2.4E-04 | 0.4 |
| GOTERM_MF_ALL               | GO:0042803~protein homodimerization activity                     | 26                            | 3.5 | 2.8E-03 | 4.3 |
| GOTERM_MF_ALL               | GO:0046982~protein heterodimerization activity                   | 18                            | 2.4 | 5.4E-03 | 8.1 |
| <b>Annotation Cluster 2</b> |                                                                  | <b>Enrichment Score: 2.54</b> |     |         |     |
| Category                    | Term                                                             | Number                        | %   | p-Value | FDR |
| GOTERM_BP_ALL               | GO:0006066~alcohol metabolic process                             | 39                            | 5.2 | 2.5E-05 | 0.0 |
| GOTERM_BP_ALL               | GO:0044262~cellular carbohydrate metabolic process               | 34                            | 4.5 | 1.8E-04 | 0.3 |
| GOTERM_BP_ALL               | GO:0005975~carbohydrate metabolic process                        | 41                            | 5.5 | 4.8E-04 | 0.9 |
| GOTERM_BP_ALL               | GO:0005996~monosaccharide metabolic process                      | 22                            | 2.9 | 7.0E-04 | 1.2 |
| GOTERM_BP_ALL               | GO:0006006~glucose metabolic process                             | 16                            | 2.1 | 2.7E-03 | 4.8 |
| GOTERM_BP_ALL               | GO:0044275~cellular carbohydrate catabolic process               | 11                            | 1.5 | 3.7E-03 | 6.5 |
| GOTERM_BP_ALL               | GO:0019318~hexose metabolic process                              | 18                            | 2.4 | 4.3E-03 | 7.5 |
| <b>Annotation Cluster 3</b> |                                                                  | <b>Enrichment Score: 2.52</b> |     |         |     |
| Category                    | Term                                                             | Number                        | %   | p-Value | FDR |
| GOTERM_BP_ALL               | GO:0009790~embryonic development                                 | 42                            | 5.6 | 1.0E-03 | 1.8 |
| GOTERM_BP_ALL               | GO:0043009~chordate embryonic development                        | 27                            | 3.6 | 2.7E-03 | 4.7 |
| GOTERM_BP_ALL               | GO:0009792~embryonic development ending in birth or egg hatching | 27                            | 3.6 | 3.0E-03 | 5.3 |
| <b>Annotation Cluster 4</b> |                                                                  | <b>Enrichment Score: 2.16</b> |     |         |     |
| Category                    | Term                                                             | Number                        | %   | p-Value | FDR |
| PANTHER_BP_ALL              | BP00019:Lipid, fatty acid and steroid metabolism                 | 51                            | 6.8 | 2.3E-04 | 0.3 |
| GOTERM_BP_ALL               | GO:0046486~glycerolipid metabolic process                        | 18                            | 2.4 | 6.9E-04 | 1.2 |
| <b>Annotation Cluster 5</b> |                                                                  | <b>Enrichment Score: 2.07</b> |     |         |     |
| Category                    | Term                                                             | Number                        | %   | p-Value | FDR |
| GOTERM_MF_ALL               | GO:0030234~enzyme regulator activity                             | 58                            | 7.8 | 1.2E-04 | 0.2 |
| PANTHER_MF_ALL              | MF00100:G-protein modulator                                      | 30                            | 4.0 | 5.5E-04 | 0.7 |
| GOTERM_MF_ALL               | GO:0030695~GTPase regulator activity                             | 30                            | 4.0 | 2.5E-03 | 3.8 |
| GOTERM_MF_ALL               | GO:0008047~enzyme activator activity                             | 26                            | 3.5 | 2.9E-03 | 4.5 |
| GOTERM_MF_ALL               | GO:0060589~nucleoside-triphosphatase regulator activity          | 30                            | 4.0 | 3.5E-03 | 5.3 |
| GOTERM_MF_ALL               | GO:0005083~small GTPase regulator activity                       | 22                            | 2.9 | 4.5E-03 | 6.8 |
| GOTERM_BP_ALL               | GO:0046578~regulation of Ras protein signal transduction         | 19                            | 2.5 | 4.7E-03 | 8.2 |
| <b>Annotation Cluster 6</b> |                                                                  | <b>Enrichment Score: 1.96</b> |     |         |     |
| Category                    | Term                                                             | Number                        | %   | p-Value | FDR |
| GOTERM_BP_ALL               | GO:0006639~acylglycerol metabolic process                        | 13                            | 1.7 | 8.7E-07 | 0.0 |
| GOTERM_BP_ALL               | GO:0006638~neutral lipid metabolic process                       | 13                            | 1.7 | 1.1E-06 | 0.0 |
| GOTERM_BP_ALL               | GO:0006662~glycerol ether metabolic process                      | 13                            | 1.7 | 1.4E-06 | 0.0 |
| GOTERM_BP_ALL               | GO:0018904~organic ether metabolic process                       | 13                            | 1.7 | 2.1E-06 | 0.0 |
| GOTERM_BP_ALL               | GO:0033700~phospholipid efflux                                   | 6                             | 0.8 | 3.2E-05 | 0.1 |
| GOTERM_BP_ALL               | GO:0034381~lipoprotein particle clearance                        | 7                             | 0.9 | 3.6E-05 | 0.1 |
| GOTERM_BP_ALL               | GO:0006641~triglyceride metabolic process                        | 10                            | 1.3 | 7.9E-05 | 0.1 |
| GOTERM_BP_ALL               | GO:0065005~protein-lipid complex assembly                        | 6                             | 0.8 | 9.4E-05 | 0.2 |
| GOTERM_BP_ALL               | GO:0034377~plasma lipoprotein particle assembly                  | 6                             | 0.8 | 9.4E-05 | 0.2 |
| GOTERM_BP_ALL               | GO:0044269~glycerol ether catabolic process                      | 5                             | 0.7 | 3.7E-04 | 0.7 |
| GOTERM_BP_ALL               | GO:0046464~acylglycerol catabolic process                        | 5                             | 0.7 | 3.7E-04 | 0.7 |
| GOTERM_BP_ALL               | GO:0046461~neutral lipid catabolic process                       | 5                             | 0.7 | 3.7E-04 | 0.7 |
| GOTERM_BP_ALL               | GO:0015914~phospholipid transport                                | 8                             | 1.1 | 4.5E-04 | 0.8 |
| GOTERM_BP_ALL               | GO:0046339~diacylglycerol metabolic process                      | 5                             | 0.7 | 6.0E-04 | 1.1 |
| GOTERM_BP_ALL               | GO:0046486~glycerolipid metabolic process                        | 18                            | 2.4 | 6.9E-04 | 1.2 |
| GOTERM_BP_ALL               | GO:0046503~glycerolipid catabolic process                        | 5                             | 0.7 | 1.3E-03 | 2.3 |
| GOTERM_BP_ALL               | GO:0046463~acylglycerol biosynthetic process                     | 5                             | 0.7 | 1.3E-03 | 2.3 |
| GOTERM_BP_ALL               | GO:0046460~neutral lipid biosynthetic process                    | 5                             | 0.7 | 1.3E-03 | 2.3 |
| GOTERM_BP_ALL               | GO:0034367~macromolecular complex remodeling                     | 6                             | 0.8 | 1.4E-03 | 2.4 |
| GOTERM_BP_ALL               | GO:0034368~protein-lipid complex remodeling                      | 6                             | 0.8 | 1.4E-03 | 2.4 |
| GOTERM_BP_ALL               | GO:0034369~plasma lipoprotein particle remodeling                | 6                             | 0.8 | 1.4E-03 | 2.4 |

|               |                                                                                    |    |     |         |     |
|---------------|------------------------------------------------------------------------------------|----|-----|---------|-----|
| GOTERM_BP_ALL | GO:0046504~glycerol ether biosynthetic process                                     | 5  | 0.7 | 1.9E-03 | 3.3 |
| GOTERM_BP_ALL | GO:0010873~positive regulation of cholesterol esterification                       | 4  | 0.5 | 2.5E-03 | 4.4 |
| GOTERM_MF_ALL | GO:0005543~phospholipid binding                                                    | 17 | 2.3 | 2.6E-03 | 3.9 |
| GOTERM_BP_ALL | GO:0019433~triglyceride catabolic process                                          | 4  | 0.5 | 3.9E-03 | 6.7 |
| GOTERM_BP_ALL | GO:0010872~regulation of cholesterol esterification                                | 4  | 0.5 | 3.9E-03 | 6.7 |
| GOTERM_BP_ALL | GO:0043691~reverse cholesterol transport                                           | 5  | 0.7 | 4.2E-03 | 7.3 |
| GOTERM_BP_ALL | GO:0006869~lipid transport                                                         | 15 | 2.0 | 4.3E-03 | 7.4 |
| GOTERM_BP_ALL | GO:0030301~cholesterol transport                                                   | 7  | 0.9 | 4.9E-03 | 8.3 |
| GOTERM_BP_ALL | GO:0015918~sterol transport                                                        | 7  | 0.9 | 4.9E-03 | 8.3 |
| GOTERM_MF_ALL | GO:0070653~high-density lipoprotein receptor binding                               | 3  | 0.4 | 4.9E-03 | 7.4 |
| GOTERM_BP_ALL | GO:0010903~negative regulation of very-low-density lipoprotein particle remodeling | 3  | 0.4 | 5.5E-03 | 9.4 |
| GOTERM_BP_ALL | GO:0042632~cholesterol homeostasis                                                 | 7  | 0.9 | 5.6E-03 | 9.5 |
| GOTERM_BP_ALL | GO:0055092~sterol homeostasis                                                      | 7  | 0.9 | 5.6E-03 | 9.5 |
| GOTERM_BP_ALL | GO:0034374~low-density lipoprotein particle remodeling                             | 4  | 0.5 | 5.7E-03 | 9.6 |

**Annotation Cluster 7 Enrichment Score: 1.77**

| Category      | Term                                            | Number | %    | p-Value | FDR |
|---------------|-------------------------------------------------|--------|------|---------|-----|
| GOTERM_BP_ALL | GO:0032502~developmental process                | 167    | 22.3 | 2.7E-03 | 4.7 |
| GOTERM_BP_ALL | GO:0009653~anatomical structure morphogenesis   | 73     | 9.8  | 2.9E-03 | 5.0 |
| GOTERM_BP_ALL | GO:0007275~multicellular organismal development | 152    | 20.3 | 4.6E-03 | 8.0 |
| GOTERM_BP_ALL | GO:0048856~anatomical structure development     | 136    | 18.2 | 4.7E-03 | 8.1 |

**Annotation Cluster 8 Enrichment Score: 1.70**

| Category      | Term                                    | Number | %   | p-Value | FDR |
|---------------|-----------------------------------------|--------|-----|---------|-----|
| GOTERM_MF_ALL | GO:0008092~cytoskeletal protein binding | 36     | 4.8 | 1.7E-03 | 2.6 |

**Annotation Cluster 9 Enrichment Score: 1.61**

| Category      | Term                                               | Number | %   | p-Value | FDR |
|---------------|----------------------------------------------------|--------|-----|---------|-----|
| GOTERM_BP_ALL | GO:0005996~monosaccharide metabolic process        | 22     | 2.9 | 7.0E-04 | 1.2 |
| GOTERM_BP_ALL | GO:0044275~cellular carbohydrate catabolic process | 11     | 1.5 | 3.7E-03 | 6.5 |
| GOTERM_BP_ALL | GO:0019318~hexose metabolic process                | 18     | 2.4 | 4.3E-03 | 7.5 |

**Annotation Cluster 10 Enrichment Score: 1.57**

| Category      | Term                         | Number | %    | p-Value | FDR |
|---------------|------------------------------|--------|------|---------|-----|
| GOTERM_MF_ALL | GO:0043169~cation binding    | 203    | 27.1 | 3.2E-03 | 4.9 |
| GOTERM_MF_ALL | GO:0043167~ion binding       | 205    | 27.4 | 3.9E-03 | 5.9 |
| GOTERM_MF_ALL | GO:0046872~metal ion binding | 199    | 26.6 | 6.0E-03 | 8.9 |

**Annotation Cluster 11 Enrichment Score: 1.56**

| Category      | Term                                       | Number | %    | p-Value | FDR |
|---------------|--------------------------------------------|--------|------|---------|-----|
| GOTERM_BP_ALL | GO:0016043~cellular component organization | 138    | 18.4 | 1.7E-03 | 3.0 |

**Annotation Cluster 12 Enrichment Score: 1.56**

| Category      | Term                                                           | Number | %   | p-Value | FDR |
|---------------|----------------------------------------------------------------|--------|-----|---------|-----|
| GOTERM_MF_ALL | GO:0015291~secondary active transmembrane transporter activity | 19     | 2.5 | 2.2E-03 | 3.4 |
| GOTERM_MF_ALL | GO:0015171~amino acid transmembrane transporter activity       | 9      | 1.2 | 2.7E-03 | 4.1 |
| GOTERM_MF_ALL | GO:0015179~L-amino acid transmembrane transporter activity     | 7      | 0.9 | 4.2E-03 | 6.3 |
| GOTERM_MF_ALL | GO:0022804~active transmembrane transporter activity           | 27     | 3.6 | 4.2E-03 | 6.4 |
| GOTERM_BP_ALL | GO:0046942~carboxylic acid transport                           | 15     | 2.0 | 4.9E-03 | 8.3 |
| GOTERM_BP_ALL | GO:0015849~organic acid transport                              | 15     | 2.0 | 5.2E-03 | 8.8 |

**Annotation Cluster 13 Enrichment Score: 1.44**

| Category      | Term                                                         | Number | %   | p-Value | FDR |
|---------------|--------------------------------------------------------------|--------|-----|---------|-----|
| GOTERM_BP_ALL | GO:0030201~heparan sulfate proteoglycan metabolic process    | 6      | 0.8 | 2.2E-04 | 0.4 |
| GOTERM_BP_ALL | GO:0015012~heparan sulfate proteoglycan biosynthetic process | 5      | 0.7 | 9.2E-04 | 1.6 |

**Annotation Cluster 14 Enrichment Score: 1.40**

| Category      | Term                                                  | Number | %   | p-Value | FDR |
|---------------|-------------------------------------------------------|--------|-----|---------|-----|
| GOTERM_BP_ALL | GO:0034637~cellular carbohydrate biosynthetic process | 10     | 1.3 | 2.9E-03 | 5.1 |
