# Supplementary material for: Integrated Expression Profiling and Genome-Wide Analysis of ChREBP Targets Reveals the Dual Role for ChREBP in Glucose-Regulated Gene Expression
Source: PubMed Central journal article supplement (PMC3141076; doi:10.1371/journal.pone.0022544), 2011-07-21
Supplement: pone.0022544.s005.pdf [file pone.0022544.s005.pdf]

**Table S3. Primer sequences for qPCR.**

| <b>qPCR primers for ChIP-seq validation</b>   |                               |                                |
|-----------------------------------------------|-------------------------------|--------------------------------|
| <b>Symbol</b>                                 | <b>Forward primers</b>        | <b>Reverse primers</b>         |
| Cyclo                                         | TGCCATCGCCAAGGAGTAG           | TGCACAGACGGTCACTCAA            |
| PKLR                                          | GTGGGTTTTGGAGAGGAACG          | GGCCAGAGTCCAGGAACCA            |
| PK-up                                         | ATCTACCCAAGTCTCAAGCCA         | TGCATTTTGGAGAAGAGCCAG          |
| DGKD                                          | TCTTGACACCCCCACCCA            | TTGACCTATGCACAGGCC             |
| DNAH10                                        | TGTGTGTTTACAACACTCAGTGATTCA   | AAGGCAGCTAAGCATGACGC           |
| EHD1                                          | AGTGCATGGGCTTTGGAGC           | CCTAGGAGGCGGGTGCTT             |
| FTO                                           | GGGTGAATCAGGTGCTATCCC         | CCTTCGGATTCCCTCTCCAC           |
| ITGAE                                         | CACAAACCCAAACTACATCCCC        | TGTGTATTTGTCAAACAGCCAGC        |
| LIPC-1                                        | TGGACACTCTGGCTGGTCAA          | GGGCAGTGGAGCTTAGGTACAT         |
| LIPC-2                                        | CTCCGCATCATCTCATTTTGG         | TGGGAGGGATGTAAGCAATGATA        |
| RAD54L2                                       | TTTATAGTGGTGGTGTTCATAATTCATTC | ACGTGAGCCAGCTGTGAGC            |
| RASGRF1-1                                     | AATCATGTGCTCCCACCACC          | TCGTGACAGCCCTGAGAACA           |
| RASGRF1-2                                     | CAGCTGCCGAGAGGAGTACTTC        | AGGGAGGTTGACGGTCCC             |
| SCD1                                          | TCCAAAATTACAACCTGCCAGTC       | GTTCAGGACCCGGGGCG              |
| TANK                                          | AACTTCCCAGAGGGTCACGG          | GTGAGGACTCTACCTAACGCCTG        |
| BCKDK                                         | CCAGATTCTGGCGCACAGA           | TGGTAAAAGGGAGCGGGAA            |
| BHLHE40                                       | GAGTCAGACGCGGGCG              | AGAAGTTGGTAACGTGGGCG           |
| COL5A2                                        | ATATTGACCGATGCAGCTACTCAC      | CGACCGGGCAGAGAGGA              |
| DGAT2-1                                       | TGTGTAATATCCCTCCCCCA          | TTGCATCATTCTGCCTGCTT           |
| DGAT2-2                                       | AAGCGGGACCTTCGCATC            | GTGCGGTGCAGGCAGAG              |
| ECE1                                          | GAACTCTGCGGTCTGGCCT           | GAACTCTGCGGTCTGGCCT            |
| ELOVL6                                        | CCGCCTTGCTTTGAATGAAG          | GCAGGTTTTACTATTTCCAATCGT       |
| TRIB3                                         | GCAGAGCCCATGGCTGTC            | GTCCTCTTTGCCACCAC              |
| TXNIP                                         | CCAGAGCGCAACAACCATTT          | TGCCCGGTCCTTGTTTACC            |
| UPB1-1                                        | CTGCCCTTGTGCCAAGAAG           | AGCAGGGCAGATGAAAGCAA           |
| UPB1-2                                        | TGCTTCTTAAATAGACCTTTGACCAG    | TTATCCAAAGCTCAGGACCCAG         |
| UPB1-3                                        | ACGTGTCTGTGTCCCAGAAGTTC       | CACAGATACTATCCTCATGGAGCTCA     |
| MTUS1-1                                       | GCCCAGGATTGGCGCTAT            | TGGAAACTTTGTCCGTTGAATG         |
| MTUS1-2                                       | AATCACGTGTGGGAGGTTAAGTC       | AAGCTTATTGTAGTGTCTTTTTTCAAACAT |
| PDK2                                          | CCAGCAGCTGTGGATACGAG          | GGGAGTGTGTGAATTGTGTGCA         |
| G6PC                                          | ACTCTTGACTCCGGCCCTCT          | CTGGCTGCACACTTTATCCTGT         |
| GPD1                                          | GTCTGCCAAGCCAGGAGGT           | TGATCTGGAGAGTGGAGCAAGAG        |
| IL6R                                          | GCCAAGCCTGTGTCTCTCG           | TGCCGCAGCTCTTGCC               |
| INHBE-1                                       | CCCCTGACAGTCTGATGGA           | CGTGTTCCTGTGATGTCTGGG          |
| INHBE-2                                       | GCATCATGCGTGTCCACATT          | TCCTCCTCCCCATCAGCTC            |
| FASN-1                                        | ACAAGGGCAAAGTCTATCTCAAAAA     | CTCACCCCAGCCACAGTGT            |
| FASN-2                                        | CAGGCGTGACTCCCTGTGA           | GAGAGTGGTGGAGGCCAAGA           |
| GAPDH                                         | GGGCTCCGGCTCCAATT             | CAGCAGGACACTAGGGAGTCAA         |
| KLF10-1                                       | ATGTGAACAAAGCGTGATCA          | CCCGCAAGCTCAGGAAGTAG           |
| KLF10-2                                       | GGCCGGAGCCAAGAGATT            | CAAATGCTTCAGAAATGCAG           |
| SREBP1                                        | TCCAAACAAGACCCTCGGG           | TGACCCCTGATAGGCACACC           |
| SLC6A9                                        | AGTAAACATGGGTCCCAGCA          | TCTGTACAAACATGGCTGACCTCT       |
| MID1IP1                                       | TTCCCCGACGGCTAATAATAAA        | GAATGCACGTGCCTTGTT             |
| <b>qPCR primers for microarray validation</b> |                               |                                |
| <b>Symbol</b>                                 | <b>Forward primers</b>        | <b>Reverse primers</b>         |
| Cyclo                                         | TGCCATCGCCAAGGAGTAG           | TGCACAGACGGTCACTCAA            |
| PKLR                                          | AGGAGATGATCAAGGCCGG           | AGCATGGTACTCGTGGGAGC           |
| SREBP1c                                       | GCCTGGACGCCCAA                | TGATAAGCTGAAGCATGTCTTCGA       |
| DGAT2                                         | GCCCTCCTCGAAGATCACCT          | GAGCTGACCTGGTTCCCATCTA         |
| PDK2                                          | CCGCTGTCCATGAAGCAGTT          | GAGGAAGGTGAAGGAGTTTTCTC        |
| SCD1                                          | TCAGAAACACATGCTGATCCTCAT      | TGGGTGTTTGCACACAAG             |
| GPD1                                          | CACCGCTTTGCTGCGTACT           | GTTCCAGATTTGGTGTATGATTCC       |
| TXNIP                                         | CAGAAGCTCCTCCCTGCTATATG       | CAGAGGAGTGGTTGGGCTCTC          |
| INHBE                                         | GACTCAACAGACGGAGCAACTG        | CGCATGCTCCTGGTGAATG            |
| SLC6A9                                        | GCTTCTACAACAAGTTCCACAATAA     | CATAGACGCTGGTGGCACAGT          |
| TRIB3                                         | GCAGAAGCCTGTGTGGAGTGT         | TGATAAGCACCCAAGCAGGAA          |
